# Supplementary material for: Research on the underwater cutting mechanism of flux-cored arc cutting for aluminum alloy process
Source: Frontiers journal article supplement (doi:10.3389/fmats.2022.1080981), 2023-01-04
Supplement: Data_Sheet_1.xlsx [file Data_Sheet_1.xlsx]

## Sheet: Group C1
0.20000 20.0000			0.20000 20.0000
0.40000 20.0000			0.40000 20.0000
0.60000 20.0000			0.60000 20.0000
0.80000 20.0000			0.80000 20.0000
1.0000 20.0000			1.0000 20.0000
1.2000 20.0000			1.2000 20.0000
1.4000 20.0000			1.4000 20.0000
1.6000 20.0000			1.6000 20.0000
1.8000 20.0000			1.8000 20.0000
2.0000 20.0000			2.0000 20.0000
2.2000 20.0000			2.2000 20.0000
2.4000 20.0000			2.4000 20.0000
2.6000 20.0000			2.6000 20.0000
2.8000 20.0000			2.8000 20.0000
3.0000 20.0000			3.0000 20.0000
3.2000 20.0000			3.2000 20.0000
3.4000 20.0000			3.4000 20.0000
3.6000 20.0000			3.6000 20.0000
3.8000 20.0000			3.8000 20.0000
4.0000 20.0000			4.0000 20.0000
4.2000 20.0000			4.2000 20.0000
4.4000 20.0000			4.4000 20.0000
4.6000 20.0000			4.6000 20.0000
4.8000 20.0000			4.8000 20.0000
5.0000 20.0000			5.0000 20.0000
5.2000 20.0000			5.2000 20.0000
5.4000 20.0000			5.4000 20.0000
5.6000 20.0000			5.6000 20.0000
5.8000 20.0000			5.8000 20.0000
6.0000 20.0000			6.0000 20.0000
6.2000 20.0000			6.2000 20.0000
6.4000 20.0000			6.4000 20.0000
6.6000 20.0000			6.6000 20.0000
6.8000 20.0000			6.8000 20.0000
7.0000 20.0000			7.0000 20.0000
7.2000 20.0000			7.2000 20.0000
7.4000 20.0000			7.4000 20.0000
7.6000 20.0000			7.6000 20.0000
7.8000 20.0000			7.8000 20.0000
8.0000 20.0000			8.0000 20.0000
8.2000 20.0000			8.2000 20.0000
8.4000 20.0000			8.4000 20.0000
8.6000 20.0000			8.6000 20.0000
8.8000 20.0001			8.8000 20.0000
9.0000 20.0001			9.0000 20.0000
9.2000 20.0001			9.2000 20.0000
9.4000 20.0001			9.4000 20.0000
9.6000 20.0002			9.6000 20.0000
9.8000 20.0002			9.8000 20.0000
10.000 20.0003			10.000 20.0000
10.200 20.0004			10.200 20.0000
10.400 20.0005			10.400 20.0000
10.600 20.0006			10.600 20.0000
10.800 20.0007			10.800 20.0000
11.000 20.0009			11.000 20.0000
11.200 20.0012			11.200 20.0000
11.400 20.0015			11.400 20.0000
11.600 20.0018			11.600 20.0000
11.800 20.0022			11.800 20.0000
12.000 20.0027			12.000 20.0000
12.200 20.0034			12.200 20.0000
12.400 20.0041			12.400 20.0000
12.600 20.0050			12.600 20.0000
12.800 20.0062			12.800 20.0000
13.000 20.0075			13.000 20.0000
13.200 20.0091			13.200 20.0000
13.400 20.0110			13.400 20.0000
13.600 20.0132			13.600 20.0000
13.800 20.0160			13.800 20.0000
14.000 20.0192			14.000 20.0000
14.200 20.0231			14.200 20.0000
14.400 20.0278			14.400 20.0000
14.600 20.0333			14.600 20.0000
14.800 20.0399			14.800 20.0000
15.000 20.0478			15.000 20.0000
15.200 20.0572			15.200 20.0000
15.400 20.0683			15.400 20.0000
15.600 20.0815			15.600 20.0000
15.800 20.0971			15.800 20.0000
16.000 20.1155			16.000 20.0000
16.200 20.1372			16.200 20.0000
16.400 20.1626			16.400 20.0000
16.600 20.1924			16.600 20.0000
16.800 20.2271			16.800 20.0000
17.000 20.2676			17.000 20.0000
17.200 20.3146			17.200 20.0000
17.400 20.3692			17.400 20.0000
17.600 20.4326			17.600 20.0000
17.800 20.5061			17.800 20.0000
18.000 20.5915			18.000 20.0000
18.200 20.6908			18.200 20.0000
18.400 20.8062			18.400 20.0000
18.600 20.9406			18.600 20.0000
18.800 21.0970			18.800 20.0000
19.000 21.2790			19.000 20.0000
19.200 21.4906			19.200 20.0000
19.400 21.7360			19.400 20.0000
19.600 22.0201			19.600 20.0000
19.800 22.3476			19.800 20.0000
20.000 22.7234			20.000 20.0000
20.200 23.1525			20.200 20.0000
20.400 23.6396			20.400 20.0000
20.600 24.1891			20.600 20.0000
20.800 24.8047			20.800 20.0000
21.000 25.4896			21.000 20.0000
21.200 26.2459			21.200 20.0001
21.400 27.0749			21.400 20.0001
21.600 27.9766			21.600 20.0001
21.800 28.9506			21.800 20.0001
22.000 29.9968			22.000 20.0001
22.200 31.1167			22.200 20.0001
22.400 32.3146			22.400 20.0002
22.600 33.5981			22.600 20.0002
22.800 34.9773			22.800 20.0002
23.000 36.4646			23.000 20.0003
23.200 38.0739			23.200 20.0004
23.400 39.8187			23.400 20.0004
23.600 41.7109			23.600 20.0005
23.800 43.7598			23.800 20.0006
24.000 45.9716			24.000 20.0007
24.200 48.3488			24.200 20.0009
24.400 50.8890			24.400 20.0011
24.600 53.5845			24.600 20.0013
24.800 56.4222			24.800 20.0015
25.000 59.3846			25.000 20.0018
25.200 62.4502			25.200 20.0022
25.400 65.5938			25.400 20.0026
25.600 68.7873			25.600 20.0032
25.800 72.0003			25.800 20.0038
26.000 75.2027			26.000 20.0046
26.200 78.3654			26.200 20.0055
26.400 81.4615			26.400 20.0066
26.600 84.4668			26.600 20.0079
26.800 87.3600			26.800 20.0095
27.000 90.1232			27.000 20.0114
27.200 92.7429			27.200 20.0136
27.400 95.2110			27.400 20.0163
27.600 97.5257			27.600 20.0195
27.800 99.6912			27.800 20.0234
28.000 101.717			28.000 20.0280
28.200 103.616			28.200 20.0334
28.400 105.402			28.400 20.0400
28.600 107.088			28.600 20.0477
28.800 108.688			28.800 20.0569
29.000 110.210			29.000 20.0679
29.200 111.661			29.200 20.0811
29.400 113.045			29.400 20.0967
29.600 114.363			29.600 20.1155
29.800 115.615			29.800 20.1379
30.000 116.798			30.000 20.1648
30.200 117.911			30.200 20.1970
30.400 118.951			30.400 20.2355
30.600 119.916			30.600 20.2818
30.800 120.802			30.800 20.3372
31.000 121.608			31.000 20.4034
31.200 122.334			31.200 20.4824
31.400 122.979			31.400 20.5765
31.600 123.544			31.600 20.6881
31.800 124.031			31.800 20.8201
32.000 124.442			32.000 20.9754
32.200 124.780			32.200 21.1572
32.400 125.049			32.400 21.3688
32.600 125.252			32.600 21.6138
32.800 125.393			32.800 21.8965
33.000 125.476			33.000 22.2224
33.200 125.507			33.200 22.5988
33.400 125.488			33.400 23.0359
33.600 125.425			33.600 23.5466
33.800 125.321			33.800 24.1468
34.000 125.181			34.000 24.8565
34.200 125.008			34.200 25.6994
34.400 124.806			34.400 26.7042
34.600 124.577			34.600 27.9022
34.800 124.326			34.800 29.3276
35.000 124.053			35.000 31.0163
35.200 123.763			35.200 33.0076
35.400 123.457			35.400 35.3391
35.600 123.137			35.600 38.0383
35.800 122.804			35.800 41.1192
36.000 122.462			36.000 44.5830
36.200 122.109			36.200 48.4221
36.400 121.749			36.400 52.6185
36.600 121.382			36.600 57.1374
36.800 121.008			36.800 61.9287
37.000 120.629			37.000 66.9322
37.200 120.246			37.200 72.0844
37.400 119.858			37.400 77.3231
37.600 119.467			37.600 82.5885
37.800 119.073			37.800 87.8231
38.000 118.676			38.000 93.0081
38.200 118.276			38.200 98.1921
38.400 117.875			38.400 103.493
38.600 117.472			38.600 109.071
38.800 117.067			38.800 115.086
39.000 116.660			39.000 121.667
39.200 116.253			39.200 128.899
39.400 115.844			39.400 136.808
39.600 115.435			39.600 145.339
39.800 115.025			39.800 154.347
40.000 114.614			40.000 163.621
40.200 114.202			40.200 172.956
40.400 113.790			40.400 182.106
40.600 113.378			40.600 190.779
40.800 112.965			40.800 198.714
41.000 112.553			41.000 205.710
41.200 112.140			41.200 211.640
41.400 111.727			41.400 216.423
41.600 111.314			41.600 220.009
41.800 110.901			41.800 222.391
42.000 110.489			42.000 223.606
42.200 110.077			42.200 223.728
42.400 109.665			42.400 222.848
42.600 109.253			42.600 221.073
42.800 108.842			42.800 218.536
43.000 108.431			43.000 215.376
43.200 108.021			43.200 211.745
43.400 107.612			43.400 207.807
43.600 107.203			43.600 203.707
43.800 106.795			43.800 199.573
44.000 106.388			44.000 195.505
44.200 105.982			44.200 191.574
44.400 105.576			44.400 187.829
44.600 105.172			44.600 184.297
44.800 104.768			44.800 180.988
45.000 104.365			45.000 177.901
45.200 103.964			45.200 175.026
45.400 103.563			45.400 172.349
45.600 103.164			45.600 169.852
45.800 102.766			45.800 167.516
46.000 102.369			46.000 165.324
46.200 101.973			46.200 163.259
46.400 101.578			46.400 161.306
46.600 101.185			46.600 159.451
46.800 100.793			46.800 157.682
47.000 100.402			47.000 155.990
47.200 100.013			47.200 154.365
47.400 99.6254			47.400 152.800
47.600 99.2390			47.600 151.289
47.800 98.8541			47.800 149.827
48.000 98.4706			48.000 148.408
48.200 98.0886			48.200 147.029
48.400 97.7080			48.400 145.686
48.600 97.3290			48.600 144.377
48.800 96.9515			48.800 143.099
49.000 96.5755			49.000 141.850
49.200 96.2011			49.200 140.627
49.400 95.8282			49.400 139.430
49.600 95.4569			49.600 138.256
49.800 95.0872			49.800 137.104
50.000 94.7190			50.000 135.973
50.200 94.3525			50.200 134.863
50.400 93.9875			50.400 133.771
50.600 93.6242			50.600 132.698
50.800 93.2624			50.800 131.642
51.000 92.9023			51.000 130.603
51.200 92.5438			51.200 129.580
51.400 92.1869			51.400 128.573
51.600 91.8316			51.600 127.580
51.800 91.4780			51.800 126.602
52.000 91.1260			52.000 125.638
52.200 90.7756			52.200 124.688
52.400 90.4268			52.400 123.751
52.600 90.0797			52.600 122.827
52.800 89.7341			52.800 121.916
53.000 89.3903			53.000 121.016
53.200 89.0480			53.200 120.129
53.400 88.7074			53.400 119.253
53.600 88.3683			53.600 118.389
53.800 88.0309			53.800 117.535
54.000 87.6952			54.000 116.693
54.200 87.3610			54.200 115.861
54.400 87.0285			54.400 115.040
54.600 86.6975			54.600 114.229
54.800 86.3682			54.800 113.427
55.000 86.0405			55.000 112.636
55.200 85.7144			55.200 111.854
55.400 85.3899			55.400 111.082
55.600 85.0670			55.600 110.319
55.800 84.7457			55.800 109.565
56.000 84.4259			56.000 108.820
56.200 84.1078			56.200 108.083
56.400 83.7913			56.400 107.356
56.600 83.4763			56.600 106.636
56.800 83.1629			56.800 105.926
57.000 82.8510			57.000 105.223
57.200 82.5408			57.200 104.528
57.400 82.2321			57.400 103.841
57.600 81.9249			57.600 103.162
57.800 81.6193			57.800 102.491
58.000 81.3153			58.000 101.827
58.200 81.0128			58.200 101.171
58.400 80.7118			58.400 100.522
58.600 80.4124			58.600 99.8800
58.800 80.1145			58.800 99.2452
59.000 79.8182			59.000 98.6173
59.200 79.5233			59.200 97.9964
59.400 79.2300			59.400 97.3822
59.600 78.9381			59.600 96.7746
59.800 78.6478			59.800 96.1736
60.000 78.3590			60.000 95.5791
60.200 78.0717			60.200 94.9910
60.400 77.7858			60.400 94.4091
60.600 77.5015			60.600 93.8334
60.800 77.2186			60.800 93.2638
61.000 76.9372			61.000 92.7002
61.200 76.6572			61.200 92.1425
61.400 76.3787			61.400 91.5907
61.600 76.1017			61.600 91.0446
61.800 75.8261			61.800 90.5041
62.000 75.5520			62.000 89.9693
62.200 75.2793			62.200 89.4400
62.400 75.0080			62.400 88.9161
62.600 74.7382			62.600 88.3976
62.800 74.4698			62.800 87.8844
63.000 74.2028			63.000 87.3763
63.200 73.9372			63.200 86.8735
63.400 73.6730			63.400 86.3757
63.600 73.4102			63.600 85.8829
63.800 73.1488			63.800 85.3950
64.000 72.8888			64.000 84.9121
64.200 72.6301			64.200 84.4339
64.400 72.3729			64.400 83.9605
64.600 72.1170			64.600 83.4917
64.800 71.8625			64.800 83.0276
65.000 71.6093			65.000 82.5680
65.200 71.3574			65.200 82.1129
65.400 71.1070			65.400 81.6623
65.600 70.8578			65.600 81.2160
65.800 70.6100			65.800 80.7741
66.000 70.3635			66.000 80.3364
66.200 70.1183			66.200 79.9030
66.400 69.8745			66.400 79.4737
66.600 69.6319			66.600 79.0485
66.800 69.3907			66.800 78.6274
67.000 69.1507			67.000 78.2103
67.200 68.9120			67.200 77.7971
67.400 68.6746			67.400 77.3879
67.600 68.4385			67.600 76.9825
67.800 68.2037			67.800 76.5809
68.000 67.9701			68.000 76.1830
68.200 67.7378			68.200 75.7889
68.400 67.5067			68.400 75.3984
68.600 67.2769			68.600 75.0116
68.800 67.0483			68.800 74.6284
69.000 66.8209			69.000 74.2486
69.200 66.5948			69.200 73.8724
69.400 66.3699			69.400 73.4996
69.600 66.1462			69.600 73.1303
69.800 65.9237			69.800 72.7643
70.000 65.7024			70.000 72.4016
70.200 65.4823			70.200 72.0422
70.400 65.2634			70.400 71.6860
70.600 65.0457			70.600 71.3331
70.800 64.8292			70.800 70.9834
71.000 64.6138			71.000 70.6367
71.200 64.3996			71.200 70.2932
71.400 64.1865			71.400 69.9527
71.600 63.9746			71.600 69.6153
71.800 63.7639			71.800 69.2808
72.000 63.5543			72.000 68.9493
72.200 63.3458			72.200 68.6208
72.400 63.1385			72.400 68.2951
72.600 62.9323			72.600 67.9722
72.800 62.7272			72.800 67.6522
73.000 62.5232			73.000 67.3350
73.200 62.3203			73.200 67.0205
73.400 62.1185			73.400 66.7088
73.600 61.9178			73.600 66.3998
73.800 61.7182			73.800 66.0934
74.000 61.5197			74.000 65.7896
74.200 61.3223			74.200 65.4885
74.400 61.1259			74.400 65.1899
74.600 60.9306			74.600 64.8939
74.800 60.7363			74.800 64.6004
75.000 60.5431			75.000 64.3094
75.200 60.3510			75.200 64.0209
75.400 60.1598			75.400 63.7348
75.600 59.9698			75.600 63.4511
75.800 59.7807			75.800 63.1698
76.000 59.5927			76.000 62.8909
76.200 59.4057			76.200 62.6143
76.400 59.2197			76.400 62.3400
76.600 59.0347			76.600 62.0680
76.800 58.8507			76.800 61.7982
77.000 58.6677			77.000 61.5307
77.200 58.4857			77.200 61.2654
77.400 58.3046			77.400 61.0022
77.600 58.1246			77.600 60.7413
77.800 57.9455			77.800 60.4824
78.000 57.7674			78.000 60.2257
78.200 57.5903			78.200 59.9711
78.400 57.4141			78.400 59.7186
78.600 57.2388			78.600 59.4681
78.800 57.0645			78.800 59.2196
79.000 56.8912			79.000 58.9732
79.200 56.7188			79.200 58.7287
79.400 56.5473			79.400 58.4862
79.600 56.3767			79.600 58.2457
79.800 56.2071			79.800 58.0070
80.000 56.0383			80.000 57.7703
80.200 55.8705			80.200 57.5355
80.400 55.7036			80.400 57.3025
80.600 55.5376			80.600 57.0714
80.800 55.3724			80.800 56.8422
81.000 55.2082			81.000 56.6147
81.200 55.0448			81.200 56.3890
81.400 54.8823			81.400 56.1651
81.600 54.7207			81.600 55.9430
81.800 54.5600			81.800 55.7226
82.000 54.4001			82.000 55.5039
82.200 54.2410			82.200 55.2869
82.400 54.0829			82.400 55.0716
82.600 53.9255			82.600 54.8580
82.800 53.7690			82.800 54.6460
83.000 53.6134			83.000 54.4357
83.200 53.4586			83.200 54.2270
83.400 53.3046			83.400 54.0199
83.600 53.1514			83.600 53.8144
83.800 52.9990			83.800 53.6104
84.000 52.8475			84.000 53.4080
84.200 52.6967			84.200 53.2072
84.400 52.5468			84.400 53.0079
84.600 52.3977			84.600 52.8101
84.800 52.2493			84.800 52.6138
85.000 52.1018			85.000 52.4190
85.200 51.9550			85.200 52.2257
85.400 51.8090			85.400 52.0338
85.600 51.6638			85.600 51.8433
85.800 51.5193			85.800 51.6543
86.000 51.3756			86.000 51.4667
86.200 51.2327			86.200 51.2805
86.400 51.0905			86.400 51.0957
86.600 50.9491			86.600 50.9123
86.800 50.8085			86.800 50.7302
87.000 50.6685			87.000 50.5495
87.200 50.5293			87.200 50.3701
87.400 50.3909			87.400 50.1920
87.600 50.2532			87.600 50.0153
87.800 50.1162			87.800 49.8398
88.000 49.9799			88.000 49.6656
88.200 49.8443			88.200 49.4927
88.400 49.7095			88.400 49.3211
88.600 49.5753			88.600 49.1507
88.800 49.4419			88.800 48.9816
89.000 49.3091			89.000 48.8137
89.200 49.1771			89.200 48.6470
89.400 49.0458			89.400 48.4815
89.600 48.9151			89.600 48.3172
89.800 48.7851			89.800 48.1540
90.000 48.6558			90.000 47.9921
90.200 48.5272			90.200 47.8313
90.400 48.3992			90.400 47.6717
90.600 48.2719			90.600 47.5132
90.800 48.1453			90.800 47.3558
91.000 48.0193			91.000 47.1996
91.200 47.8940			91.200 47.0444
91.400 47.7693			91.400 46.8904
91.600 47.6453			91.600 46.7374
91.800 47.5219			91.800 46.5856
92.000 47.3992			92.000 46.4348
92.200 47.2771			92.200 46.2850
92.400 47.1556			92.400 46.1364
92.600 47.0347			92.600 45.9887
92.800 46.9145			92.800 45.8421
93.000 46.7949			93.000 45.6965
93.200 46.6759			93.200 45.5519
93.400 46.5575			93.400 45.4084
93.600 46.4398			93.600 45.2658
93.800 46.3226			93.800 45.1242
94.000 46.2060			94.000 44.9836
94.200 46.0901			94.200 44.8440
94.400 45.9747			94.400 44.7053
94.600 45.8599			94.600 44.5676
94.800 45.7457			94.800 44.4308
95.000 45.6321			95.000 44.2950
95.200 45.5191			95.200 44.1601
95.400 45.4066			95.400 44.0261
95.600 45.2947			95.600 43.8930
95.800 45.1834			95.800 43.7608
96.000 45.0727			96.000 43.6296
96.200 44.9625			96.200 43.4992
96.400 44.8529			96.400 43.3697
96.600 44.7438			96.600 43.2410
96.800 44.6353			96.800 43.1133
97.000 44.5273			97.000 42.9864
97.200 44.4199			97.200 42.8603
97.400 44.3130			97.400 42.7351
97.600 44.2066			97.600 42.6107
97.800 44.1008			97.800 42.4872
98.000 43.9956			98.000 42.3645
98.200 43.8908			98.200 42.2426
98.400 43.7866			98.400 42.1215
98.600 43.6829			98.600 42.0012
98.800 43.5797			98.800 41.8817
99.000 43.4770			99.000 41.7630
99.200 43.3749			99.200 41.6450
99.400 43.2733			99.400 41.5279
99.600 43.1721			99.600 41.4115
99.800 43.0715			99.800 41.2959
100.00 42.9714			100.00 41.1810
100.20 42.8717			100.20 41.0669

## Sheet: Group C2
0.20000 20.0000			0.4	20
0.40000 20.0000			0.8	20
0.60000 20.0000			1.2	20
0.80000 20.0000			1.6	20
1.0000 20.0000			2	20
1.2000 20.0000			2.4	20
1.4000 20.0000			2.8	20
1.6000 20.0000			3.2	20
1.8000 20.0000			3.6	20
2.0000 20.0000			4	20
2.2000 20.0000			4.4	20
2.4000 20.0000			4.8	20
2.6000 20.0000			5.2	20
2.8000 20.0000			5.6	20
3.0000 20.0000			6	20
3.2000 20.0000			6.4	20
3.4000 20.0000			6.8	20
3.6000 20.0000			7.2	20
3.8000 20.0000			7.6	20
4.0000 20.0000			8	20
4.2000 20.0000			8.4	20
4.4000 20.0000			8.8	20
4.6000 20.0000			9.2	20
4.8000 20.0000			9.6	20
5.0000 20.0000			10	20
5.2000 20.0000			10.4	20
5.4000 20.0000			10.8	20
5.6000 20.0000			11.2	20
5.8000 20.0000			11.6	20
6.0000 20.0000			12	20
6.2000 20.0000			12.4	20
6.4000 20.0000			12.8	20
6.6000 20.0000			13.2	20
6.8000 20.0000			13.6	20
7.0000 20.0000			14	20
7.2000 20.0000			14.4	20
7.4000 20.0000			14.8	20
7.6000 20.0000			15.2	20
7.8000 20.0000			15.6	20
8.0000 20.0000			16	20
8.2000 20.0000			16.4	20
8.4000 20.0000			16.8	20
8.6000 20.0000			17.2	20
8.8000 20.0000			17.6	20.0272
9.0000 20.0000			18	20.2717
9.2000 20.0000			18.4	21.1824
9.4000 20.0001			18.8	23.3583
9.6000 20.0001			19.2	27.3338
9.8000 20.0001			19.6	33.4205
10.000 20.0001			20	41.5783
10.200 20.0001			20.4	51.3862
10.400 20.0002			20.8	62.1875
10.600 20.0002			21.2	73.2193
10.800 20.0003			21.6	83.7783
11.000 20.0004			22	93.3345
11.200 20.0005			22.4	101.567
11.400 20.0006			22.8	108.378
11.600 20.0007			23.2	113.929
11.800 20.0009			23.6	118.562
12.000 20.0011			24	122.618
12.200 20.0014			24.4	126.312
12.400 20.0017			24.8	129.708
12.600 20.0021			25.2	132.759
12.800 20.0025			25.6	135.372
13.000 20.0031			26	137.47
13.200 20.0038			26.4	139.019
13.400 20.0046			26.8	140.03
13.600 20.0056			27.2	140.546
13.800 20.0068			27.6	140.627
14.000 20.0082			28	140.346
14.200 20.0099			28.4	139.775
14.400 20.0119			28.8	138.98
14.600 20.0144			29.2	138.021
14.800 20.0173			29.6	136.948
15.000 20.0208			30	135.799
15.200 20.0250			30.4	134.606
15.400 20.0299			30.8	133.389
15.600 20.0358			31.2	132.164
15.800 20.0428			31.6	130.941
16.000 20.0512			32	129.728
16.200 20.0610			32.4	128.528
16.400 20.0727			32.8	127.343
16.600 20.0864			33.2	126.174
16.800 20.1026			33.6	125.022
17.000 20.1215			34	123.886
17.200 20.1437			34.4	122.765
17.400 20.1697			34.8	121.659
17.600 20.2000			35.2	120.567
17.800 20.2354			35.6	119.487
18.000 20.2769			36	118.42
18.200 20.3253			36.4	117.364
18.400 20.3819			36.8	116.319
18.600 20.4481			37.2	115.286
18.800 20.5257			37.6	114.262
19.000 20.6165			38	113.249
19.200 20.7229			38.4	112.246
19.400 20.8472			38.8	111.252
19.600 20.9923			39.2	110.268
19.800 21.1614			39.6	109.293
20.000 21.3577			40	108.328
20.200 21.5848			40.4	107.372
20.400 21.8462			40.8	106.425
20.600 22.1456			41.2	105.487
20.800 22.4866			41.6	104.558
21.000 22.8727			42	103.638
21.200 23.3069			42.4	102.727
21.400 23.7922			42.8	101.824
21.600 24.3306			43.2	100.929
21.800 24.9242			43.6	100.043
22.000 25.5750			44	99.1658
22.200 26.2861			44.4	98.2967
22.400 27.0622			44.8	97.4357
22.600 27.9098			45.2	96.5831
22.800 28.8377			45.6	95.7385
23.000 29.8565			46	94.9023
23.200 30.9786			46.4	94.0739
23.400 32.2168			46.8	93.2537
23.600 33.5837			47.2	92.4414
23.800 35.0910			47.6	91.637
24.000 36.7490			48	90.8404
24.200 38.5659			48.4	90.0517
24.400 40.5464			48.8	89.2706
24.600 42.6915			49.2	88.4973
24.800 44.9978			49.6	87.7316
25.000 47.4575			50	86.9736
25.200 50.0590			50.4	86.223
25.400 52.7862			50.8	85.4801
25.600 55.6187			51.2	84.7445
25.800 58.5327			51.6	84.0165
26.000 61.5026			52	83.2958
26.200 64.5019			52.4	82.5824
26.400 67.5045			52.8	81.8763
26.600 70.4847			53.2	81.1775
26.800 73.4184			53.6	80.4859
27.000 76.2835			54	79.8014
27.200 79.0616			54.4	79.1239
27.400 81.7398			54.8	78.4536
27.600 84.3119			55.2	77.7902
27.800 86.7792			55.6	77.1337
28.000 89.1493			56	76.4841
28.200 91.4336			56.4	75.8413
28.400 93.6453			56.8	75.2053
28.600 95.7970			57.2	74.576
28.800 97.8986			57.6	73.9533
29.000 99.9572			58	73.3372
29.200 101.975			58.4	72.7277
29.400 103.952			58.8	72.1246
29.600 105.882			59.2	71.5279
29.800 107.760			59.6	70.9376
30.000 109.576			60	70.3535
30.200 111.321			60.4	69.7757
30.400 112.986			60.8	69.2041
30.600 114.561			61.2	68.6385
30.800 116.040			61.6	68.0791
31.000 117.416			62	67.5256
31.200 118.684			62.4	66.978
31.400 119.841			62.8	66.4363
31.600 120.886			63.2	65.9004
31.800 121.819			63.6	65.3703
32.000 122.642			64	64.8458
32.200 123.357			64.4	64.327
32.400 123.970			64.8	63.8137
32.600 124.484			65.2	63.306
32.800 124.905			65.6	62.8037
33.000 125.240			66	62.3068
33.200 125.495			66.4	61.8152
33.400 125.675			66.8	61.3289
33.600 125.789			67.2	60.8479
33.800 125.841			67.6	60.3719
34.000 125.839			68	59.9012
34.200 125.787			68.4	59.4354
34.400 125.692			68.8	58.9747
34.600 125.559			69.2	58.5188
34.800 125.392			69.6	58.0679
35.000 125.195			70	57.6218
35.200 124.973			70.4	57.1805
35.400 124.728			70.8	56.7439
35.600 124.463			71.2	56.312
35.800 124.181			71.6	55.8847
36.000 123.884			72	55.4619
36.200 123.574			72.4	55.0437
36.400 123.253			72.8	54.6299
36.600 122.922			73.2	54.2206
36.800 122.582			73.6	53.8156
37.000 122.234			74	53.4149
37.200 121.880			74.4	53.0185
37.400 121.520			74.8	52.6263
37.600 121.155			75.2	52.2382
37.800 120.785			75.6	51.8543
38.000 120.410			76	51.4744
38.200 120.032			76.4	51.0986
38.400 119.651			76.8	50.7268
38.600 119.266			77.2	50.3588
38.800 118.879			77.6	49.9948
39.000 118.489			78	49.6346
39.200 118.097			78.4	49.2782
39.400 117.702			78.8	48.9255
39.600 117.306			79.2	48.5766
39.800 116.908			79.6	48.2313
40.000 116.508			80	47.8897
40.200 116.107			80.4	47.5516
40.400 115.704			80.8	47.2171
40.600 115.300			81.2	46.886
40.800 114.895			81.6	46.5585
41.000 114.489			82	46.2343
41.200 114.082			82.4	45.9135
41.400 113.675			82.8	45.5961
41.600 113.267			83.2	45.2819
41.800 112.858			83.6	44.971
42.000 112.449			84	44.6634
42.200 112.039			84.4	44.3589
42.400 111.629			84.8	44.0576
42.600 111.219			85.2	43.7594
42.800 110.809			85.6	43.4642
43.000 110.399			86	43.1721
43.200 109.989			86.4	42.883
43.400 109.579			86.8	42.5969
43.600 109.170			87.2	42.3137
43.800 108.760			87.6	42.0334
44.000 108.351			88	41.756
44.200 107.943			88.4	41.4814
44.400 107.535			88.8	41.2096
44.600 107.128			89.2	40.9406
44.800 106.721			89.6	40.6743
45.000 106.315			90	40.4107
45.200 105.910			90.4	40.1497
45.400 105.506			90.8	39.8915
45.600 105.103			91.2	39.6358
45.800 104.700			91.6	39.3827
46.000 104.299			92	39.1321
46.200 103.898			92.4	38.8841
46.400 103.499			92.8	38.6386
46.600 103.101			93.2	38.3955
46.800 102.703			93.6	38.1549
47.000 102.308			94	37.9166
47.200 101.913			94.4	37.6807
47.400 101.519			94.8	37.4472
47.600 101.127			95.2	37.216
47.800 100.736			95.6	36.9871
48.000 100.347			96	36.7605
48.200 99.9585			96.4	36.5361
48.400 99.5716			96.8	36.3139
48.600 99.1862			97.2	36.0939
48.800 98.8021			97.6	35.8761
49.000 98.4194
49.200 98.0382
49.400 97.6585
49.600 97.2802
49.800 96.9034
50.000 96.5280
50.200 96.1542
50.400 95.7818
50.600 95.4110
50.800 95.0417
51.000 94.6739
51.200 94.3076
51.400 93.9429
51.600 93.5797
51.800 93.2181
52.000 92.8580
52.200 92.4995
52.400 92.1425
52.600 91.7870
52.800 91.4332
53.000 91.0809
53.200 90.7301
53.400 90.3810
53.600 90.0334
53.800 89.6873
54.000 89.3428
54.200 88.9999
54.400 88.6586
54.600 88.3189
54.800 87.9807
55.000 87.6440
55.200 87.3090
55.400 86.9755
55.600 86.6436
55.800 86.3132
56.000 85.9844
56.200 85.6572
56.400 85.3316
56.600 85.0075
56.800 84.6849
57.000 84.3639
57.200 84.0445
57.400 83.7266
57.600 83.4103
57.800 83.0955
58.000 82.7823
58.200 82.4706
58.400 82.1605
58.600 81.8518
58.800 81.5448
59.000 81.2392
59.200 80.9352
59.400 80.6327
59.600 80.3317
59.800 80.0323
60.000 79.7343
60.200 79.4379
60.400 79.1429
60.600 78.8495
60.800 78.5576
61.000 78.2671
61.200 77.9782
61.400 77.6907
61.600 77.4047
61.800 77.1202
62.000 76.8371
62.200 76.5556
62.400 76.2754
62.600 75.9968
62.800 75.7196
63.000 75.4438
63.200 75.1695
63.400 74.8966
63.600 74.6251
63.800 74.3551
64.000 74.0865
64.200 73.8193
64.400 73.5535
64.600 73.2892
64.800 73.0262
65.000 72.7646
65.200 72.5044
65.400 72.2456
65.600 71.9882
65.800 71.7321
66.000 71.4774
66.200 71.2241
66.400 70.9721
66.600 70.7215
66.800 70.4722
67.000 70.2242
67.200 69.9776
67.400 69.7323
67.600 69.4883
67.800 69.2457
68.000 69.0043
68.200 68.7643
68.400 68.5255
68.600 68.2880
68.800 68.0519
69.000 67.8169
69.200 67.5833
69.400 67.3509
69.600 67.1198
69.800 66.8900
70.000 66.6614
70.200 66.4340
70.400 66.2079
70.600 65.9830
70.800 65.7593
71.000 65.5368
71.200 65.3156
71.400 65.0955
71.600 64.8767
71.800 64.6590
72.000 64.4426
72.200 64.2273
72.400 64.0132
72.600 63.8002
72.800 63.5884
73.000 63.3778
73.200 63.1683
73.400 62.9600
73.600 62.7528
73.800 62.5467
74.000 62.3418
74.200 62.1380
74.400 61.9353
74.600 61.7337
74.800 61.5332
75.000 61.3338
75.200 61.1355
75.400 60.9383
75.600 60.7421
75.800 60.5471
76.000 60.3531
76.200 60.1601
76.400 59.9682
76.600 59.7774
76.800 59.5876
77.000 59.3988
77.200 59.2111
77.400 59.0244
77.600 58.8387
77.800 58.6541
78.000 58.4704
78.200 58.2878
78.400 58.1061
78.600 57.9254
78.800 57.7458
79.000 57.5671
79.200 57.3893
79.400 57.2126
79.600 57.0368
79.800 56.8619
80.000 56.6881
80.200 56.5151
80.400 56.3431
80.600 56.1721
80.800 56.0020
81.000 55.8328
81.200 55.6645
81.400 55.4971
81.600 55.3306
81.800 55.1651
82.000 55.0004
82.200 54.8367
82.400 54.6738
82.600 54.5118
82.800 54.3507
83.000 54.1904
83.200 54.0311
83.400 53.8726
83.600 53.7149
83.800 53.5581
84.000 53.4021
84.200 53.2470
84.400 53.0928
84.600 52.9393
84.800 52.7867
85.000 52.6349
85.200 52.4839
85.400 52.3337
85.600 52.1844
85.800 52.0358
86.000 51.8881
86.200 51.7411
86.400 51.5949
86.600 51.4495
86.800 51.3049
87.000 51.1611
87.200 51.0180
87.400 50.8757
87.600 50.7341
87.800 50.5933
88.000 50.4533
88.200 50.3140
88.400 50.1754
88.600 50.0376
88.800 49.9005
89.000 49.7642
89.200 49.6286
89.400 49.4936
89.600 49.3595
89.800 49.2260
90.000 49.0932
90.200 48.9611
90.400 48.8297
90.600 48.6990
90.800 48.5690
91.000 48.4397
91.200 48.3111
91.400 48.1832
91.600 48.0559
91.800 47.9293
92.000 47.8033
92.200 47.6780
92.400 47.5534
92.600 47.4294
92.800 47.3061
93.000 47.1834
93.200 47.0614
93.400 46.9400
93.600 46.8192
93.800 46.6990
94.000 46.5795
94.200 46.4606
94.400 46.3423
94.600 46.2247
94.800 46.1076
95.000 45.9912
95.200 45.8753
95.400 45.7601
95.600 45.6454
95.800 45.5314
96.000 45.4179
96.200 45.3050
96.400 45.1927
96.600 45.0810
96.800 44.9698
97.000 44.8592
97.200 44.7492
97.400 44.6397
97.600 44.5308
97.800 44.4225
98.000 44.3147
98.200 44.2074
98.400 44.1008
98.600 43.9946
98.800 43.8890
99.000 43.7839
99.200 43.6794
99.400 43.5754
99.600 43.4719
99.800 43.3689
100.00 43.2665
100.20 43.1645

## Sheet: Group C3
0.20000 20.0000			0.20000 20.0000
0.40000 20.0000			0.40000 20.0000
0.60000 20.0000			0.60000 20.0000
0.80000 20.0000			0.80000 20.0000
1.0000 20.0000			1.0000 20.0000
1.2000 20.0000			1.2000 20.0000
1.4000 20.0000			1.4000 20.0000
1.6000 20.0000			1.6000 20.0000
1.8000 20.0000			1.8000 20.0000
2.0000 20.0001			2.0000 20.0000
2.2000 20.0001			2.2000 20.0000
2.4000 20.0002			2.4000 20.0000
2.6000 20.0004			2.6000 20.0000
2.8000 20.0006			2.8000 20.0000
3.0000 20.0010			3.0000 20.0000
3.2000 20.0016			3.2000 20.0000
3.4000 20.0026			3.4000 20.0000
3.6000 20.0039			3.6000 20.0000
3.8000 20.0059			3.8000 20.0000
4.0000 20.0086			4.0000 20.0000
4.2000 20.0123			4.2000 20.0000
4.4000 20.0173			4.4000 20.0000
4.6000 20.0240			4.6000 20.0000
4.8000 20.0329			4.8000 20.0000
5.0000 20.0444			5.0000 20.0000
5.2000 20.0591			5.2000 20.0000
5.4000 20.0777			5.4000 20.0000
5.6000 20.1010			5.6000 20.0000
5.8000 20.1300			5.8000 20.0000
6.0000 20.1656			6.0000 20.0000
6.2000 20.2092			6.2000 20.0000
6.4000 20.2625			6.4000 20.0000
6.6000 20.3273			6.6000 20.0000
6.8000 20.4062			6.8000 20.0000
7.0000 20.5023			7.0000 20.0000
7.2000 20.6196			7.2000 20.0000
7.4000 20.7628			7.4000 20.0000
7.6000 20.9376			7.6000 20.0000
7.8000 21.1510			7.8000 20.0000
8.0000 21.4107			8.0000 20.0000
8.2000 21.7260			8.2000 20.0000
8.4000 22.1074			8.4000 20.0000
8.6000 22.5664			8.6000 20.0000
8.8000 23.1154			8.8000 20.0000
9.0000 23.7665			9.0000 20.0000
9.2000 24.5323			9.2000 20.0000
9.4000 25.4243			9.4000 20.0000
9.6000 26.4533			9.6000 20.0000
9.8000 27.6281			9.8000 20.0000
10.000 28.9545			10.000 20.0000
10.200 30.4353			10.200 20.0000
10.400 32.0695			10.400 20.0000
10.600 33.8525			10.600 20.0000
10.800 35.7760			10.800 20.0000
11.000 37.8370			11.000 20.0000
11.200 40.0484			11.200 20.0000
11.400 42.4467			11.400 20.0000
11.600 45.0927			11.600 20.0000
11.800 48.0663			11.800 20.0000
12.000 51.4555			12.000 20.0000
12.200 55.3498			12.200 20.0000
12.400 59.8376			12.400 20.0000
12.600 65.0027			12.600 20.0000
12.800 70.9055			12.800 20.0000
13.000 77.5609			13.000 20.0000
13.200 84.9343			13.200 20.0000
13.400 92.9727			13.400 20.0000
13.600 101.577			13.600 20.0000
13.800 110.591			13.800 20.0000
14.000 119.804			14.000 20.0000
14.200 128.990			14.200 20.0000
14.400 137.950			14.400 20.0000
14.600 146.508			14.600 20.0000
14.800 154.493			14.800 20.0000
15.000 161.760			15.000 20.0000
15.200 168.210			15.200 20.0000
15.400 173.800			15.400 20.0000
15.600 178.525			15.600 20.0000
15.800 182.408			15.800 20.0001
16.000 185.484			16.000 20.0001
16.200 187.802			16.200 20.0001
16.400 189.445			16.400 20.0001
16.600 190.545			16.600 20.0001
16.800 191.266			16.800 20.0002
17.000 191.780			17.000 20.0002
17.200 192.239			17.200 20.0002
17.400 192.752			17.400 20.0003
17.600 193.374			17.600 20.0003
17.800 194.113			17.800 20.0004
18.000 194.938			18.000 20.0005
18.200 195.798			18.200 20.0006
18.400 196.636			18.400 20.0007
18.600 197.391			18.600 20.0009
18.800 198.004			18.800 20.0011
19.000 198.428			19.000 20.0013
19.200 198.629			19.200 20.0016
19.400 198.589			19.400 20.0019
19.600 198.299			19.600 20.0023
19.800 197.763			19.800 20.0027
20.000 196.992			20.000 20.0033
20.200 196.007			20.200 20.0040
20.400 194.828			20.400 20.0048
20.600 193.482			20.600 20.0057
20.800 191.995			20.800 20.0069
21.000 190.394			21.000 20.0083
21.200 188.702			21.200 20.0100
21.400 186.944			21.400 20.0120
21.600 185.141			21.600 20.0144
21.800 183.312			21.800 20.0173
22.000 181.472			22.000 20.0208
22.200 179.636			22.200 20.0249
22.400 177.814			22.400 20.0298
22.600 176.015			22.600 20.0357
22.800 174.247			22.800 20.0427
23.000 172.514			23.000 20.0510
23.200 170.821			23.200 20.0609
23.400 169.171			23.400 20.0728
23.600 167.563			23.600 20.0869
23.800 166.000			23.800 20.1037
24.000 164.481			24.000 20.1238
24.200 163.006			24.200 20.1479
24.400 161.572			24.400 20.1768
24.600 160.180			24.600 20.2114
24.800 158.826			24.800 20.2530
25.000 157.510			25.000 20.3028
25.200 156.230			25.200 20.3626
25.400 154.984			25.400 20.4341
25.600 153.770			25.600 20.5196
25.800 152.585			25.800 20.6214
26.000 151.430			26.000 20.7421
26.200 150.301			26.200 20.8849
26.400 149.198			26.400 21.0527
26.600 148.118			26.600 21.2490
26.800 147.061			26.800 21.4774
27.000 146.025			27.000 21.7415
27.200 145.009			27.200 22.0452
27.400 144.011			27.400 22.3935
27.600 143.032			27.600 22.7931
27.800 142.069			27.800 23.2530
28.000 141.121			28.000 23.7855
28.200 140.189			28.200 24.4060
28.400 139.271			28.400 25.1342
28.600 138.367			28.600 25.9940
28.800 137.475			28.800 27.0134
29.000 136.596			29.000 28.2241
29.200 135.728			29.200 29.6610
29.400 134.872			29.400 31.3604
29.600 134.027			29.600 33.3625
29.800 133.192			29.800 35.7027
30.000 132.367			30.000 38.4077
30.200 131.552			30.200 41.4935
30.400 130.746			30.400 44.9669
30.600 129.950			30.600 48.8264
30.800 129.162			30.800 53.0504
31.000 128.383			31.000 57.5957
31.200 127.613			31.200 62.4030
31.400 126.850			31.400 67.4073
31.600 126.096			31.600 72.5412
31.800 125.349			31.800 77.7322
32.000 124.610			32.000 82.9018
32.200 123.879			32.200 87.9714
32.400 123.155			32.400 92.8697
32.600 122.438			32.600 97.5755
32.800 121.728			32.800 102.145
33.000 121.024			33.000 106.705
33.200 120.328			33.200 111.430
33.400 119.639			33.400 116.499
33.600 118.956			33.600 122.066
33.800 118.279			33.800 128.226
34.000 117.609			34.000 134.991
34.200 116.945			34.200 142.304
34.400 116.287			34.400 150.061
34.600 115.636			34.600 158.114
34.800 114.990			34.800 166.260
35.000 114.350			35.000 174.269
35.200 113.716			35.200 181.931
35.400 113.088			35.400 189.075
35.600 112.466			35.600 195.566
35.800 111.849			35.800 201.283
36.000 111.238			36.000 206.144
36.200 110.632			36.200 210.115
36.400 110.032			36.400 213.203
36.600 109.437			36.600 215.439
36.800 108.847			36.800 216.874
37.000 108.263			37.000 217.570
37.200 107.684			37.200 217.600
37.400 107.109			37.400 217.043
37.600 106.540			37.600 215.980
37.800 105.976			37.800 214.491
38.000 105.417			38.000 212.658
38.200 104.862			38.200 210.558
38.400 104.312			38.400 208.267
38.600 103.768			38.600 205.856
38.800 103.227			38.800 203.386
39.000 102.692			39.000 200.909
39.200 102.161			39.200 198.463
39.400 101.634			39.400 196.075
39.600 101.113			39.600 193.763
39.800 100.595			39.800 191.536
40.000 100.082			40.000 189.397
40.200 99.5732			40.200 187.346
40.400 99.0688			40.400 185.380
40.600 98.5686			40.600 183.492
40.800 98.0725			40.800 181.679
41.000 97.5807			41.000 179.933
41.200 97.0930			41.200 178.248
41.400 96.6093			41.400 176.620
41.600 96.1296			41.600 175.042
41.800 95.6540			41.800 173.511
42.000 95.1822			42.000 172.022
42.200 94.7144			42.200 170.572
42.400 94.2504			42.400 169.157
42.600 93.7902			42.600 167.775
42.800 93.3338			42.800 166.423
43.000 92.8812			43.000 165.099
43.200 92.4322			43.200 163.800
43.400 91.9869			43.400 162.525
43.600 91.5452			43.600 161.272
43.800 91.1071			43.800 160.039
44.000 90.6725			44.000 158.825
44.200 90.2414			44.200 157.628
44.400 89.8138			44.400 156.449
44.600 89.3896			44.600 155.285
44.800 88.9688			44.800 154.137
45.000 88.5514			45.000 153.004
45.200 88.1373			45.200 151.885
45.400 87.7265			45.400 150.780
45.600 87.3189			45.600 149.689
45.800 86.9146			45.800 148.611
46.000 86.5135			46.000 147.546
46.200 86.1155			46.200 146.494
46.400 85.7206			46.400 145.455
46.600 85.3289			46.600 144.427
46.800 84.9402			46.800 143.412
47.000 84.5545			47.000 142.409
47.200 84.1719			47.200 141.417
47.400 83.7922			47.400 140.436
47.600 83.4154			47.600 139.466
47.800 83.0416			47.800 138.507
48.000 82.6707			48.000 137.559
48.200 82.3026			48.200 136.622
48.400 81.9373			48.400 135.695
48.600 81.5749			48.600 134.778
48.800 81.2152			48.800 133.871
49.000 80.8582			49.000 132.973
49.200 80.5040			49.200 132.086
49.400 80.1525			49.400 131.207
49.600 79.8036			49.600 130.338
49.800 79.4574			49.800 129.478
50.000 79.1138			50.000 128.627
50.200 78.7728			50.200 127.785
50.400 78.4343			50.400 126.952
50.600 78.0984			50.600 126.127
50.800 77.7650			50.800 125.311
51.000 77.4340			51.000 124.502
51.200 77.1056			51.200 123.702
51.400 76.7796			51.400 122.910
51.600 76.4560			51.600 122.126
51.800 76.1348			51.800 121.350
52.000 75.8160			52.000 120.581
52.200 75.4995			52.200 119.820
52.400 75.1854			52.400 119.067
52.600 74.8735			52.600 118.320
52.800 74.5640			52.800 117.582
53.000 74.2567			53.000 116.850
53.200 73.9516			53.200 116.125
53.400 73.6488			53.400 115.408
53.600 73.3482			53.600 114.697
53.800 73.0498			53.800 113.993
54.000 72.7535			54.000 113.296
54.200 72.4593			54.200 112.605
54.400 72.1673			54.400 111.921
54.600 71.8774			54.600 111.244
54.800 71.5895			54.800 110.573
55.000 71.3038			55.000 109.908
55.200 71.0200			55.200 109.250
55.400 70.7383			55.400 108.597
55.600 70.4586			55.600 107.951
55.800 70.1809			55.800 107.311
56.000 69.9051			56.000 106.677
56.200 69.6313			56.200 106.049
56.400 69.3594			56.400 105.427
56.600 69.0895			56.600 104.810
56.800 68.8214			56.800 104.199
57.000 68.5553			57.000 103.594
57.200 68.2909			57.200 102.994
57.400 68.0285			57.400 102.400
57.600 67.7678			57.600 101.812
57.800 67.5090			57.800 101.228
58.000 67.2520			58.000 100.650
58.200 66.9968			58.200 100.078
58.400 66.7433			58.400 99.5103
58.600 66.4916			58.600 98.9481
58.800 66.2416			58.800 98.3909
59.000 65.9933			59.000 97.8387
59.200 65.7468			59.200 97.2916
59.400 65.5019			59.400 96.7494
59.600 65.2587			59.600 96.2120
59.800 65.0172			59.800 95.6795
60.000 64.7773			60.000 95.1517
60.200 64.5390			60.200 94.6287
60.400 64.3024			60.400 94.1103
60.600 64.0674			60.600 93.5966
60.800 63.8339			60.800 93.0874
61.000 63.6020			61.000 92.5827
61.200 63.3717			61.200 92.0825
61.400 63.1430			61.400 91.5867
61.600 62.9157			61.600 91.0953
61.800 62.6900			61.800 90.6081
62.000 62.4658			62.000 90.1253
62.200 62.2431			62.200 89.6467
62.400 62.0219			62.400 89.1722
62.600 61.8021			62.600 88.7019
62.800 61.5838			62.800 88.2357
63.000 61.3670			63.000 87.7736
63.200 61.1516			63.200 87.3154
63.400 60.9376			63.400 86.8612
63.600 60.7250			63.600 86.4109
63.800 60.5138			63.800 85.9645
64.000 60.3040			64.000 85.5219
64.200 60.0955			64.200 85.0832
64.400 59.8885			64.400 84.6481
64.600 59.6827			64.600 84.2168
64.800 59.4783			64.800 83.7892
65.000 59.2753			65.000 83.3652
65.200 59.0735			65.200 82.9448
65.400 58.8731			65.400 82.5279
65.600 58.6740			65.600 82.1146
65.800 58.4761			65.800 81.7047
66.000 58.2795			66.000 81.2983
66.200 58.0842			66.200 80.8954
66.400 57.8901			66.400 80.4958
66.600 57.6973			66.600 80.0995
66.800 57.5057			66.800 79.7065
67.000 57.3153			67.000 79.3168
67.200 57.1261			67.200 78.9304
67.400 56.9381			67.400 78.5471
67.600 56.7514			67.600 78.1670
67.800 56.5658			67.800 77.7901
68.000 56.3813			68.000 77.4162
68.200 56.1981			68.200 77.0455
68.400 56.0160			68.400 76.6777
68.600 55.8350			68.600 76.3130
68.800 55.6552			68.800 75.9513
69.000 55.4765			69.000 75.5925
69.200 55.2989			69.200 75.2366
69.400 55.1224			69.400 74.8837
69.600 54.9470			69.600 74.5335
69.800 54.7727			69.800 74.1863
70.000 54.5995			70.000 73.8418
70.200 54.4274			70.200 73.5001
70.400 54.2563			70.400 73.1611
70.600 54.0863			70.600 72.8249
70.800 53.9173			70.800 72.4913
71.000 53.7494			71.000 72.1604
71.200 53.5825			71.200 71.8322
71.400 53.4166			71.400 71.5066
71.600 53.2517			71.600 71.1835
71.800 53.0878			71.800 70.8630
72.000 52.9250			72.000 70.5451
72.200 52.7631			72.200 70.2296
72.400 52.6022			72.400 69.9167
72.600 52.4423			72.600 69.6062
72.800 52.2833			72.800 69.2981
73.000 52.1253			73.000 68.9925
73.200 51.9683			73.200 68.6892
73.400 51.8122			73.400 68.3883
73.600 51.6571			73.600 68.0898
73.800 51.5028			73.800 67.7935
74.000 51.3495			74.000 67.4996
74.200 51.1971			74.200 67.2080
74.400 51.0457			74.400 66.9186
74.600 50.8951			74.600 66.6314
74.800 50.7454			74.800 66.3464
75.000 50.5966			75.000 66.0636
75.200 50.4487			75.200 65.7830
75.400 50.3017			75.400 65.5046
75.600 50.1555			75.600 65.2283
75.800 50.0102			75.800 64.9540
76.000 49.8657			76.000 64.6819
76.200 49.7221			76.200 64.4118
76.400 49.5794			76.400 64.1438
76.600 49.4374			76.600 63.8778
76.800 49.2963			76.800 63.6138
77.000 49.1561			77.000 63.3518
77.200 49.0166			77.200 63.0918
77.400 48.8780			77.400 62.8337
77.600 48.7401			77.600 62.5776
77.800 48.6031			77.800 62.3233
78.000 48.4668			78.000 62.0710
78.200 48.3314			78.200 61.8206
78.400 48.1967			78.400 61.5720
78.600 48.0628			78.600 61.3252
78.800 47.9297			78.800 61.0803
79.000 47.7973			79.000 60.8372
79.200 47.6657			79.200 60.5959
79.400 47.5348			79.400 60.3564
79.600 47.4047			79.600 60.1187
79.800 47.2753			79.800 59.8826
80.000 47.1467			80.000 59.6484
80.200 47.0188			80.200 59.4158
80.400 46.8916			80.400 59.1849
80.600 46.7651			80.600 58.9557
80.800 46.6394			80.800 58.7282
81.000 46.5144			81.000 58.5023
81.200 46.3900			81.200 58.2781
81.400 46.2664			81.400 58.0555
81.600 46.1435			81.600 57.8345
81.800 46.0212			81.800 57.6151
82.000 45.8997			82.000 57.3973
82.200 45.7788			82.200 57.1810
82.400 45.6586			82.400 56.9663
82.600 45.5390			82.600 56.7531
82.800 45.4201			82.800 56.5415
83.000 45.3019			83.000 56.3314
83.200 45.1844			83.200 56.1227
83.400 45.0675			83.400 55.9156
83.600 44.9512			83.600 55.7099
83.800 44.8356			83.800 55.5057
84.000 44.7206			84.000 55.3029
84.200 44.6063			84.200 55.1015
84.400 44.4925			84.400 54.9016
84.600 44.3794			84.600 54.7031
84.800 44.2670			84.800 54.5060
85.000 44.1551			85.000 54.3102
85.200 44.0438			85.200 54.1158
85.400 43.9332			85.400 53.9228
85.600 43.8232			85.600 53.7312
85.800 43.7137			85.800 53.5408
86.000 43.6049			86.000 53.3518
86.200 43.4966			86.200 53.1641
86.400 43.3889			86.400 52.9777
86.600 43.2818			86.600 52.7926
86.800 43.1753			86.800 52.6088
87.000 43.0694			87.000 52.4262
87.200 42.9640			87.200 52.2449
87.400 42.8592			87.400 52.0648
87.600 42.7549			87.600 51.8860
87.800 42.6512			87.800 51.7084
88.000 42.5481			88.000 51.5320
88.200 42.4455			88.200 51.3568
88.400 42.3435			88.400 51.1828
88.600 42.2420			88.600 51.0100
88.800 42.1410			88.800 50.8384
89.000 42.0406			89.000 50.6679
89.200 41.9407			89.200 50.4986
89.400 41.8413			89.400 50.3304
89.600 41.7425			89.600 50.1634
89.800 41.6442			89.800 49.9975
90.000 41.5464			90.000 49.8327
90.200 41.4491			90.200 49.6690
90.400 41.3523			90.400 49.5064
90.600 41.2560			90.600 49.3449
90.800 41.1603			90.800 49.1845
91.000 41.0650			91.000 49.0251
91.200 40.9702			91.200 48.8668
91.400 40.8759			91.400 48.7095
91.600 40.7821			91.600 48.5533
91.800 40.6888			91.800 48.3982
92.000 40.5960			92.000 48.2440
92.200 40.5037			92.200 48.0909
92.400 40.4118			92.400 47.9388
92.600 40.3204			92.600 47.7877
92.800 40.2295			92.800 47.6375
93.000 40.1391			93.000 47.4884
93.200 40.0491			93.200 47.3402
93.400 39.9596			93.400 47.1930
93.600 39.8705			93.600 47.0468
93.800 39.7819			93.800 46.9015
94.000 39.6937			94.000 46.7572
94.200 39.6060			94.200 46.6138
94.400 39.5188			94.400 46.4713
94.600 39.4320			94.600 46.3297
94.800 39.3456			94.800 46.1891
95.000 39.2596			95.000 46.0494
95.200 39.1741			95.200 45.9105
95.400 39.0891			95.400 45.7726
95.600 39.0044			95.600 45.6355
95.800 38.9202			95.800 45.4994
96.000 38.8364			96.000 45.3641
96.200 38.7530			96.200 45.2296
96.400 38.6701			96.400 45.0961
96.600 38.5876			96.600 44.9633
96.800 38.5054			96.800 44.8314
97.000 38.4237			97.000 44.7004
97.200 38.3424			97.200 44.5702
97.400 38.2615			97.400 44.4408
97.600 38.1810			97.600 44.3122
97.800 38.1009			97.800 44.1844
98.000 38.0212			98.000 44.0575
98.200 37.9419			98.200 43.9313
98.400 37.8630			98.400 43.8059
98.600 37.7844			98.600 43.6813
98.800 37.7063			98.800 43.5575
99.000 37.6286			99.000 43.4345
99.200 37.5512			99.200 43.3122
99.400 37.4742			99.400 43.1907
99.600 37.3976			99.600 43.0699
99.800 37.3213			99.800 42.9499
100.00 37.2455			100.00 42.8307
100.20 37.1700			100.20 42.7121
