# Supplementary material for: Research on the underwater cutting mechanism of flux-cored arc cutting for aluminum alloy process
Source: Frontiers journal article supplement (doi:10.3389/fmats.2022.1080981), 2023-01-04
Supplement: Data_Sheet_2.xlsx [file Data_Sheet_2.xlsx]

## Sheet: Group C1
0	21.5056	19.9653
0.4	21.5056	19.9654
0.8	21.5056	19.9656
1.2	21.5056	19.9657
1.6	21.5056	19.9659
2	21.4599	19.966
2.4	21.4599	19.9662
2.8	21.4599	19.9663
3.2	21.4599	19.9665
3.6	21.4599	19.9666
4	21.5186	19.9668
4.4	21.5186	19.9669
4.8	21.5186	19.9671
5.2	21.5186	19.9672
5.6	21.4011	19.9674
6	21.4011	19.9675
6.4	21.4011	19.9677
6.8	21.4011	19.9678
7.2	21.4011	19.968
7.6	21.695	19.9681
8	21.695	19.9683
8.4	21.695	19.9684
8.8	21.695	19.9686
9.2	21.695	19.9687
9.6	21.695	19.9689
10	21.695	19.969
10.4	21.695	19.9692
10.8	21.695	19.9693
11.2	21.695	19.9695
11.6	21.8713	19.9696
12	21.8713	19.9698
12.4	21.8713	19.9699
12.8	21.8713	19.9701
13.2	21.8713	19.9702
13.6	22.0476	19.9704
14	22.0476	19.9705
14.4	22.0476	19.9707
14.8	22.0476	19.9708
15.2	22.2239	19.971
15.6	22.2239	19.9711
16	22.2239	19.9713
16.4	22.2239	19.9714
16.8	22.2239	19.9716
17.2	22.1652	19.9717
17.6	22.1652	19.9719
18	22.1652	19.972
18.4	22.1652	19.9722
18.8	22.1652	19.9723
19.2	22.3415	19.9725
19.6	22.3415	19.9726
20	22.3415	19.9847
20.4	22.3415	19.9253
20.8	22.3415	19.9253
21.2	22.2033	19.9253
21.6	22.2033	19.9253
22	22.2033	19.9847
22.4	22.2033	19.9847
22.8	22.6147	19.9847
23.2	22.6147	19.9847
23.6	22.6147	19.9847
24	22.6147	19.9847
24.4	22.6147	19.9847
24.8	22.791	19.9847
25.2	22.791	19.9847
25.6	22.791	19.9847
26	22.791	19.9847
26.4	22.791	20.0436
26.8	22.9674	20.0436
27.2	22.9674	20.0436
27.6	22.9674	20.0436
28	22.9674	19.9847
28.4	22.9674	19.9847
28.8	23.2025	19.9847
29.2	23.2025	19.9253
29.6	23.2025	19.9253
30	23.2025	19.9253
30.4	23.3788	19.9253
30.8	23.3788	20.0436
31.2	23.3788	20.0436
31.6	23.3788	20.0436
32	23.3788	19.866
32.4	23.7902	19.866
32.8	23.7902	19.866
33.2	23.7902	19.866
33.6	23.7902	20.0436
34	23.7902	20.0436
34.4	24.0841	20.0589
34.8	24.0841	20.0589
35.2	24.0841	19.9407
35.6	24.0841	19.9407
36	24.0841	19.9407
36.4	24.2016	19.9407
36.8	24.2016	20.0001
37.2	24.2016	20.0001
37.6	24.2016	20.0001
38	24.2016	20.0589
38.4	24.6131	20.0589
38.8	24.6131	20.0589
39.2	24.6131	20.0589
39.6	24.6131	20.0589
40	24.6131	20.0589
40.4	25.1268	20.0589
40.8	25.1268	20.0589
41.2	25.1268	20.1177
41.6	25.1268	20.1177
42	25.4794	20.1177
42.4	25.4794	20.0589
42.8	25.4794	20.0589
43.2	25.4794	20.0589
43.6	25.4794	20.0589
44	25.8321	20.0589
44.4	25.8321	20.0589
44.8	25.8321	20.0589
45.2	25.8321	20.0589
45.6	25.8321	20.0589
46	26.4786	20.0589
46.4	26.4786	20.0589
46.8	26.4786	20.1764
47.2	26.4786	20.1764
47.6	26.4786	20.1764
48	27.0663	20.294
48.4	27.0663	20.294
48.8	27.0663	20.294
49.2	27.0663	20.294
49.6	27.8304	20.1764
50	27.8304	20.1764
50.4	27.8304	20.1764
50.8	27.8304	20.1764
51.2	27.8304	20.2352
51.6	28.6532	20.2352
52	28.6532	20.2352
52.4	28.6532	19.8814
52.8	28.6532	19.8814
53.2	28.6532	19.8814
53.6	29.6524	19.9199
54	29.6524	19.9199
54.4	29.6524	20.3909
54.8	29.6524	20.3909
55.2	29.6524	20.3909
55.6	30.8198	20.4497
56	30.8198	20.4497
56.4	30.8198	20.4497
56.8	30.8198	20.4497
57.2	30.8198	20.626
57.6	32.4494	20.626
58	32.4494	20.626
58.4	32.4494	20.626
58.8	32.4494	20.5084
59.2	32.4494	20.5084
59.6	34.5446	20.5084
60	34.5446	20.5672
60.4	34.5446	20.5672
60.8	34.5446	20.5672
61.2	34.5446	20.5672
61.6	36.7562	20.626
62	36.7562	20.626
62.4	36.7562	20.626
62.8	36.7562	20.626
63.2	39.026	20.8611
63.6	39.026	20.8611
64	39.026	20.8611
64.4	39.026	21.0374
64.8	39.026	21.0374
65.2	40.7103	21.0374
65.6	40.7103	21.0374
66	40.7103	20.5084
66.4	40.7103	20.5084
66.8	40.7103	20.5084
67.2	42.2161	20.5084
67.6	42.2161	21.0962
68	42.2161	21.0962
68.4	42.2161	21.0962
68.8	42.2161	21.155
69.2	44.1853	21.155
69.6	44.1853	21.155
70	44.1853	21.155
70.4	44.1853	21.3313
70.8	44.1853	21.3313
71.2	46.6178	21.3313
71.6	46.6178	21.5664
72	46.6178	21.5664
72.4	46.6178	21.5664
72.8	49.5136	21.5969
73.2	49.5136	21.5969
73.6	49.5136	21.5969
74	49.5136	21.5969
74.4	49.5136	21.5969
74.8	52.3978	21.5969
75.2	52.3978	21.9496
75.6	52.3978	21.9496
76	52.3978	21.9496
76.4	52.3978	22.1847
76.8	55.5678	22.1847
77.2	55.5678	22.1847
77.6	55.5678	22.1847
78	55.5678	22.4198
78.4	55.5678	22.4198
78.8	59.6779	22.4198
79.2	59.6779	22.6549
79.6	59.6779	22.6549
80	59.6779	22.6549
80.4	63.7519	22.6549
80.8	63.7519	22.8899
81.2	63.7519	22.8899
81.6	63.7519	22.8899
82	63.7519	22.8899
82.4	69.0863	23.5952
82.8	69.0863	23.5952
83.2	69.0863	23.5952
83.6	69.0863	23.8891
84	69.0863	23.8891
84.4	77.6715	23.8891
84.8	77.6715	23.8891
85.2	77.6715	24.0654
85.6	77.6715	24.0654
86	77.6715	24.0654
86.4	86.327	24.0654
86.8	86.327	24.5944
87.2	86.327	24.5944
87.6	86.327	24.5944
88	94.3677	24.9471
88.4	94.3677	24.9471
88.8	94.3677	24.9471
89.2	94.3677	24.9471
89.6	94.3677	25.4173
90	101.616	25.4173
90.4	101.616	25.4173
90.8	101.616	25.8875
91.2	101.616	25.8875
91.6	101.616	25.8875
92	107.956	25.8646
92.4	107.956	25.8646
92.8	107.956	26.0997
93.2	107.956	26.0997
93.6	107.956	26.0997
94	122.035	26.0997
94.4	122.035	26.9225
94.8	122.035	26.9225
95.2	122.035	26.9225
95.6	122.035	27.0988
96	138.859	27.0988
96.4	138.859	27.0988
96.8	138.859	27.0988
97.2	138.859	27.4515
97.6	144.932	27.4515
98	144.916	27.4515
98.4	144.916	27.4515
98.8	144.916	27.8041
99.2	144.916	27.8041
99.6	139.663	27.8041
100	139.663	28.0392
	139.663	28.0392
	139.663	28.0392
	139.663	28.0392
	133.639	28.627
	133.639	28.627
	133.639	28.627
	133.639	29.2735
	133.639	29.2735
	139.429	29.2735
	139.429	29.2735
	139.429	29.8612
	139.429	29.8612
	144.385	29.8612
	144.385	29.8612
	144.385	30.852
	144.385	30.852
	144.385	30.852
	151.003	31.8996
	151.003	31.8996
	151.003	31.8996
	151.003	31.8996
	151.003	33.2964
	164.099	33.2964
	164.099	33.2964
	164.099	33.2964
	164.099	34.7514
	164.099	34.7514
	177.91	34.7136
	177.91	34.7136
	177.91	35.6448
	177.91	35.6448
	177.91	35.6448
	184.055	35.6448
	184.055	38.1474
	184.055	38.1474
	184.055	38.1474
	172.064	38.1474
	172.064	39.195
	172.064	39.195
	172.064	39.195
	172.064	40.5889
	119.341	40.5889
	119.341	40.5889
	119.356	40.5889
	119.356	42.5001
	119.356	42.5001
	97.7025	42.5001
	97.7025	42.5001
	97.7025	44.6431
	97.7025	44.6431
	97.7025	44.6431
	87.761	46.6122
	87.761	46.6122
	87.761	46.6122
	87.761	46.6122
	87.761	49.2764
	81.3369	49.2764
	81.3369	49.2764
	81.3369	49.2764
	81.3369	52.277
	81.3369	52.277
	74.8677	52.277
	74.8677	55.1011
	74.8677	55.1011
	74.8677	55.1011
	70.1756	55.1011
	70.1756	59.3662
	70.1756	59.3662
	70.1756	59.3662
	70.1756	65.2772
	68.8568	65.2772
	68.8568	65.2772
	68.8568	65.2772
	68.8568	73.2994
	68.8568	73.2994
	65.4153	73.2771
	65.4153	73.2771
	65.4153	73.2771
	65.4153	85.9371
	65.4153	85.9371
	61.2855	85.9371
	61.2855	97.0817
	61.2855	97.0817
	61.2855	97.0817
	61.2855	97.0817
	58.7558	106.93
	58.7558	106.93
	58.7558	106.93
	58.7558	106.93
	58.7558	116.124
	56.7961	116.124
	56.841	116.124
	56.841	125.839
	56.841	125.839
	55.1119	125.839
	55.1119	125.839
	55.1119	135.362
	55.1119	135.362
	55.1119	135.362
	53.21	147.483
	53.21	147.483
	53.21	147.483
	53.21	147.483
	53.21	162.702
	51.4232	162.702
	51.4232	162.702
	51.4232	162.702
	51.4232	180.563
	51.4232	180.563
	49.8085	180.563
	49.8085	195.776
	49.8085	195.776
	49.8085	195.776
	49.8085	195.776
	48.3606	206.303
	48.3606	206.303
	48.3606	206.303
	48.3606	218.354
	47.0285	218.354
	47.0285	218.354
	47.0285	218.354
	47.0285	230.941
	47.0285	230.941
	45.8702	230.941
	45.8702	230.941
	45.8702	230.941
	45.8702	238.306
	45.8702	238.306
	44.7698	238.306
	44.7698	229.939
	44.7698	229.939
	44.7698	229.939
	44.7698	229.939
	43.7273	216.335
	43.7273	216.335
	43.7273	216.335
	43.7273	216.335
	43.7273	204.166
	42.9164	204.166
	42.954	204.166
	42.954	189.094
	42.954	189.094
	42.1432	189.094
	42.1432	189.094
	42.1432	172.33
	42.1432	172.33
	42.1432	172.33
	41.3323	172.33
	41.3323	145.239
	41.3323	145.239
	41.3323	145.239
	41.3323	102.55
	40.5794	102.55
	40.5794	102.55
	40.5794	102.55
	40.5794	85.9945
	40.5794	85.9945
	40.0003	85.9945
	40.0003	85.9945
	40.0003	78.1408
	40.0003	78.1408
	40.0003	78.1408
	39.3019	72.9338
	39.3019	72.9338
	39.3019	72.9338
	39.3019	72.9338
	39.3019	68.8684
	38.7781	68.8684
	38.7781	68.8684
	38.7781	65.7137
	38.7781	65.7137
	38.7781	65.7063
	38.1961	65.7063
	38.1961	65.7063
	38.1961	62.2074
	38.1961	62.2074
	38.1961	62.2074
	37.6723	59.855
	37.6723	59.855
	37.6723	59.855
	37.6723	59.855
	37.6723	57.7801
	37.1485	57.7801
	37.1485	57.7801
	37.1485	57.7801
	37.1485	55.9934
	36.7411	55.9934
	36.8015	55.9934
	36.8015	54.3796
	36.8015	54.3796
	36.8015	54.3796
	36.3359	54.3796
	36.3359	52.881
	36.3359	52.881
	36.3359	52.881
	36.3359	51.613
	35.9285	51.613
	35.9285	51.613
	35.9285	51.613
	35.9285	50.345
	35.5211	50.345
	35.5211	50.345
	35.5211	50.345
	35.5211	49.1884
	35.5211	49.1884
	35.1137	49.1884
	35.1137	48.1459
	35.1137	48.1459
	35.1137	48.1459
	35.1137	48.1459
	34.7645	47.1613
	34.7645	47.1613
	34.7645	47.1613
	34.7645	46.2347
	34.7645	46.2347
	34.4153	46.2347
	34.4153	46.2347
	34.4153	45.4238
	34.4153	45.4238
	34.4153	45.4163
	34.1243	45.4163
	34.1243	44.4896
	34.1243	44.4896
	34.1243	44.4896
	34.1243	44.4896
	33.8333	43.6788
	33.8333	43.6788
	33.8333	43.6788
	33.8333	43.6788
	33.5423	43.0417
	33.5423	43.0417
	33.5423	43.0417
	33.5423	43.0417
	33.5423	42.3467
	33.1931	42.3467
	33.2309	42.3467
	33.2309	41.7096
	33.2309	41.7096
	33.2309	41.7096
	32.9981	41.7096
	32.9981	41.1884
	32.9981	41.1884
	32.9981	41.1884
	32.9981	41.1884
	32.7071	40.6092
	32.7071	40.6092
	32.7071	40.6092
	32.7071	40.088
	32.4743	40.088
	32.4743	40.088
	32.4743	40.088
	32.4743	39.5646
	32.4743	39.5646
	32.2997	39.5646
	32.2997	39.5646
	32.2997	39.1572
	32.2997	39.1572
	32.2997	39.1572
	32.0087	38.6334
	32.0087	38.6334
	32.0087	38.6334
	32.0087	38.6334
	32.0087	38.226
	31.7759	38.226
	31.7759	38.226
	31.7759	38.226
	31.7759	37.8186
	31.7759	37.8413
	31.6013	37.8413
	31.6013	37.8413
	31.6013	37.2593
	31.6013	37.2593
	31.3103	37.2593
	31.3103	37.2593
	31.3103	36.9101
	31.3103	36.9101
	31.3103	36.9101
	31.1357	36.5609
	31.1357	36.5609
	31.1357	36.5609
	31.1357	36.5609
	31.1357	36.2117
	30.9611	36.2117
	30.9913	36.2117
	30.9913	36.2117
	30.9913	35.9207
		35.9207
		35.9207
		35.5715
		35.5715
		35.5715
		35.5715
		35.2805
		35.2805
		35.2805
		35.2805
		34.9895
		34.9895
		34.9895
		34.7567
		34.7567
		34.7567
		34.7567
		34.4075
		34.4075
		34.4075
		34.1747
		34.1747
		34.1747
		34.1747
		33.9419
		33.9419
		33.9419
		33.9419
		33.6509
		33.6887
		33.6887
		33.6887
		33.3395
		33.3395
		33.3395
		33.3395
		33.1067
		33.1067
		33.1067
		32.8739
		32.8739
		32.8739
		32.8739
		32.6993
		32.6993
		32.6993
		32.6993
		32.4083
		32.4083
		32.4083
		32.2919
		32.2919
		32.2919
		32.2919
		32.0591
		32.0591
		32.0591
		32.0591
		31.8845
		31.8845
		31.8845
		31.6517
		31.6517
		31.6517
		31.6517
		31.5353
		31.5353
		31.5353
		31.3607
		31.3607
		31.3607
		31.3607
		31.1861

## Sheet: Group C2
19.866	19.6879
19.866	19.6879
20.2787	19.6879
20.2787	90.0096
20.2787	90.0096
20.2787	90.0096
19.8066	86.1665
19.8066	86.1665
19.8066	86.1665
20.7489	86.1665
20.7489	111.954
20.7489	111.954
20.7489	111.954
23.3938	26.6264
23.3938	26.6264
23.3938	26.6264
27.4492	26.6264
27.4492	82.6677
27.4492	82.6677
27.4492	82.6677
32.8867	82.6677
32.8867	62.0428
32.8867	62.0428
32.8867	62.0428
40.5084	57.4994
40.5084	57.4994
40.5084	57.4994
49.3697	57.4994
49.3697	54.7329
49.3697	54.7329
49.3697	54.7329
59.8625	59.1709
59.8625	59.1709
59.8625	59.1709
72.0183	59.1709
75.7376	59.1709
75.7524	58.4942
75.7524	58.4942
75.7524	58.4942
91.8069	26.5829
91.8069	26.5829
91.8069	26.5829
108.905	26.5829
108.905	28.5812
108.905	28.5812
108.905	28.5812
114.402	28.5812
114.402	30.7485
114.402	30.7485
114.402	30.7485
112.085	32.6691
112.085	32.6691
112.085	32.6691
108.386	32.6691
108.386	123.695
108.386	123.695
108.386	123.695
105.85	97.4991
105.85	97.4991
105.85	97.4991
106.023	97.4991
106.023	112.085
106.023	112.085
106.023	112.085
110.753	89.8524
110.753	89.8524
110.753	89.8524
123.812	89.8524
123.812	39.071
123.812	39.071
123.812	39.071
141.887	39.071
141.887	65.4418
141.887	65.4418
141.887	65.4418
155.427	43.4772
155.427	43.4772
155.427	43.4772
172.465	43.4772
172.465	47.7051
172.465	47.7051
172.465	47.7051
181.354	47.7051
181.95	63.7211
181.989	63.7583
181.989	63.7583
181.631	63.7583
181.631	53.3443
181.631	53.3443
181.631	53.3443
184.375	53.3443
184.375	74.4735
184.375	74.4735
184.375	74.4735
184.256	147.596
184.256	147.596
184.256	147.596
180.199	147.596
180.199	137.053
180.199	137.053
180.199	137.053
171.25	137.053
171.25	108.078
171.25	108.078
171.25	108.078
162.221	79.1656
162.221	79.1656
162.221	79.1656
156.591	79.1656
156.591	93.7991
156.591	93.7991
156.591	93.7991
154.814	118.725
154.814	118.725
154.814	118.725
154.814	118.725
152.446	115.482
152.446	115.482
152.446	115.482
147.537	115.482
147.537	118.783
147.537	118.783
147.537	118.783
142.103	131.321
142.103	131.321
142.103	131.321
136.702	131.321
136.702	149.604
136.702	149.604
136.702	149.604
119.883	149.604
115.25	157.597
115.28	157.628
115.28	157.628
115.28	157.628
101.537	171.46
101.537	171.46
101.537	171.46
94.2889	171.46
94.2889	181.543
94.2889	181.543
94.2889	181.543
91.8741	184.645
91.8741	184.645
91.8741	184.645
87.7398	184.645
87.7398	187.031
87.7398	187.031
87.7398	187.031
84.9292	187.031
84.9292	187.807
84.9292	187.807
84.9292	187.807
82.6922	186.375
82.6922	186.375
82.6922	186.375
78.4514	186.375
78.4514	180.111
78.4514	180.111
78.4514	180.111
73.0727	180.111
73.0727	175.398
73.0727	175.398
73.0727	175.398
67.459	160.056
67.459	160.056
67.459	160.056
62.4115	160.056
62.4115	156.325
62.4115	156.325
62.4115	156.325
58.9073	131.234
58.9073	131.234
58.9073	131.234
57.1206	131.234
57.1206	113.079
57.1206	113.079
57.1206	113.079
55.161	113.079
54.4117	91.6441
54.3893	91.6217
54.3893	91.6217
51.9686	91.6217
51.9686	98.8088
51.9686	98.8088
51.9686	98.8088
49.4298	98.8088
49.4298	107.797
49.4298	107.797
49.4298	107.797
47.1131	70.075
47.1131	70.075
47.1131	70.075
45.2598	70.075
45.2598	70.075
45.2598	70.075
45.2598	70.075
42.7694	70.075
42.7694	63.4789
42.7694	63.4789
42.7694	63.4789
42.1902	64.2819
42.1902	64.2819
42.1902	64.2819
41.2057	64.2819
41.2057	60.4963
41.2057	60.4963
41.2057	60.4963
40.5107	60.4963
40.5107	59.5189
40.5107	59.5189
40.5107	59.5189
40.1052	65.6585
40.1052	65.6585
40.1052	65.6585
40.1052	65.6585
40.1052	57.7898
40.1052	57.7898
40.1052	57.7898
40.1632	57.7898
40.1632	59.6342
40.1632	59.6342
40.1632	59.6342
39.873	57.6169
39.873	57.6169
39.873	57.6169
39.8148	57.6169
39.8148	57.6169
39.777	101.823
39.777	101.823
39.777	101.823
39.5442	101.823
39.5442	53.0839
39.5442	53.0839
39.5442	53.0839
39.0786	68.604
39.0786	68.604
39.0786	68.604
38.3802	68.604
38.3802	49.5081
38.3802	49.5081
38.3802	49.5081
37.6818	49.5081
37.6818	70.3239
37.6818	70.3239
37.6818	70.3239
36.7506	50.5479
36.7506	50.5479
36.7506	50.5479
35.6448	50.5479
35.6448	43.9481
35.6448	43.9481
35.6448	43.9481
34.539	41.921
34.539	41.921
34.539	41.921
33.8406	41.921
33.8406	40.4152
33.8406	40.4152
33.8406	40.4152
33.375	40.4152
33.375	55.0435
33.375	55.0435
33.375	55.0435
32.9676	47.0756
32.9676	47.0756
32.9676	47.0756
32.793	47.0756
32.793	43.2531
32.793	43.2531
32.793	43.2531
32.4438	43.2531
32.4438	44.701
32.4438	44.701
32.4438	44.701
32.1528	44.701
32.0719	61.5839
32.0719	61.5839
32.0719	61.5839
31.9555	61.5839
31.9555	36.9025
31.9555	36.9025
31.9555	36.9025
31.8391	66.9182
31.8391	66.9182
31.8391	66.9182
31.8391	66.9182
31.8391	36.6697
31.8391	36.6697
31.8391	36.6697
31.9555	36.6697
31.9555	36.7861
31.9555	36.7861
31.9555	36.7861
32.3629	57.557
32.3629	57.557
32.3629	57.557
32.6539	57.557
32.6539	60.3794
32.6539	60.3794
32.6539	60.3794
32.8867	60.3794
32.8867	65.3696
32.8867	65.3696
32.8867	65.3696
33.0031	49.6013
33.0031	49.6013
33.0031	49.6013
33.2359	49.6013
33.2359	68.3522
33.2359	68.3522
33.2359	68.3522
33.2359	49.3697
33.2359	49.3697
33.2359	49.3697
32.8285	49.3697
32.8285	66.8035
32.8285	66.8035
32.8285	66.8035
32.3047	66.8035
32.3047	47.4584
32.3047	47.4584
32.3047	47.4584
32.1301	47.4584
31.7809	55.0211
31.7809	55.0211
31.7809	55.0211
31.3736	55.0211
31.3736	70.0728
31.3736	70.0728
31.3736	70.0728
31.0826	70.0728
31.0826	39.9871
31.0826	39.9871
31.0826	39.9871
30.9662	34.5163
30.9662	34.5163
30.9662	34.5163
30.908	34.5163
30.908	34.4581
30.908	34.4581
30.908	34.4581
30.8498	34.2835
30.8498	34.2835
30.8498	34.2835
30.7916	34.2835
30.7916	34.1089
30.7916	34.1089
30.7916	34.1089
30.7916	34.1089
30.7916	34.0507
30.7916	34.0507
30.7916	34.0507
30.7334	33.9925
30.7334	33.9925
30.7334	33.9925
30.7334	33.9925
30.7334	33.9343
30.7334	33.9343
30.7334	33.9343
30.6752	33.9343
30.6752	33.9343
30.6752	33.9343
30.6752	33.9343
30.7334	33.8761
30.7334	33.8761
30.7334	33.8761
30.7334	33.8761
30.7334	33.9343
30.7334	33.9343
30.7334	33.9343
30.7916	33.9343
30.784	33.985
30.784	33.985
30.784	33.985
30.7258	33.985
30.7258	33.985
30.7258	33.985
30.7258	33.985
30.784	33.985
30.784	33.985
30.784	33.985
30.784	33.985
30.8422	34.0432
30.8422	34.0432
30.8422	34.0432
30.8422	34.0432
30.8422	33.985
30.8422	33.985
30.8422	33.985
30.8422	33.985
30.8422	33.985
30.8422	33.985
30.784	33.985
30.784	33.9268
30.784	33.9268
30.784	33.9268
30.784	33.9268
30.784	33.8686
30.784	33.8686
30.784	33.8686
30.7258	33.7522
30.7258	33.7522
30.7258	33.7522
30.6676	33.7522
30.6676	33.7522
30.6676	33.7522
30.6676	33.7522
30.5512	33.6358
30.5512	33.6358
30.5512	33.6358
30.493	33.6358
30.493	33.5194
30.493	33.5194
30.493	33.5194
30.4348	33.403
30.4348	33.403
30.4348	33.403
30.3184	33.403
30.3184	33.403
30.3108	33.2208
30.3108	33.2208
30.3108	33.2208
30.1944	33.2208
30.1944	33.1044
30.1944	33.1044
30.1944	33.1044
30.1362	32.9298
30.1362	32.9298
30.1362	32.9298
30.0198	32.9298
30.0198	32.8134
30.0198	32.8134
30.0198	32.8134
29.9613	32.8134
29.9613	32.6388
29.9613	32.6388
29.9613	32.6388
29.8437	32.6388
29.8437	32.5224
29.8437	32.5224
29.8437	32.5224
29.7262	32.3478
29.7262	32.3478
29.7262	32.3478
29.5498	32.3478
29.5498	32.2314
29.5498	32.2314
29.5498	32.2314
29.4323	32.2314
29.4323	31.9986
29.4323	31.9986
29.4323	31.9986
29.256	31.8822
29.256	31.8822
29.256	31.8822
29.1972	31.8822
29.1972	31.7658
29.1972	31.7658
29.1972	31.7658
29.0796	31.7658
29.0796	31.5912
29.0796	31.5912
29.0796	31.5912
28.9621	31.4748
28.9621	31.4748
28.9621	31.4748
28.8445	31.4748
28.8674	31.4975
28.8674	31.2647
28.8674	31.2647
28.8674	31.2647
28.6911	31.1483
28.6911	31.1483
28.6911	31.1483
28.5736	31.1483
28.5736	31.0319
28.5736	31.0319
28.5736	31.0319
28.456	31.0319
28.456	30.8573
28.456	30.8573
28.456	30.8573
28.3972	30.7991
28.3972	30.7991
28.3972	30.7991
28.2797	30.7991
28.2797	30.6245
28.2797	30.6245
28.2797	30.6245
28.2209	30.5663
28.2209	30.5663
28.2209	30.5663
28.1034	30.5663
28.1034	30.4499
28.1034	30.4499
28.1034	30.4499
28.1034	30.4499
28.1034	30.3335
28.1034	30.3335
28.1034	30.3335
27.9858	30.2753
27.9858	30.2753
27.9858	30.2753
27.927	30.2753
27.927	30.1589
27.927	30.1589
27.927	30.1589
27.8683	30.1589
27.8683	30.0425
27.8683	30.0425
27.8683	30.0425
27.8095	29.9254
27.8095	29.9254
27.8095	29.9254
27.8095	29.9254
27.8476	29.9635
27.8476	29.846
27.8476	29.846
27.8476	29.846
27.7889	29.7284
27.7889	29.7284
27.7889	29.7284
27.7301	29.7284
27.7301	29.6697
27.7301	29.6697
27.7301	29.6697
27.6713	29.6697
27.6713	29.6109
27.6713	29.6109
27.6713	29.6109
27.6125	29.4933
27.6125	29.4933
27.6125	29.4933
27.495	29.4933
27.495	29.4346
27.495	29.4346
27.495	29.4346
27.495	29.4346
27.495	29.317
27.495	29.317
27.495	29.317
27.495	29.1995
27.495	29.1995
27.495	29.1995
27.4362	29.1995
27.4362	29.1407
27.4362	29.1407
27.4362	29.1407
27.3187	29.0231
27.3187	29.0231
27.3187	29.0231
27.2599	29.0231
27.2599	28.9056
27.2599	28.9056
27.2599	28.9056
27.2011	28.9056
27.2011	28.788
27.2011	28.788
27.2011	28.788

## Sheet: GroupC3
20.7873	20.4935
20.7873	20.4935
20.7873	20.4347
20.7873	20.4347
20.7873	20.4347
20.7873	20.4347
20.7873	20.4347
20.7873	20.4935
20.7873	20.4935
20.7873	20.4935
20.7873	20.4935
20.7873	20.4935
20.7873	20.4935
20.7873	20.4935
20.7873	20.4935
20.7873	20.4935
20.7873	20.4935
20.7873	20.4935
20.7873	20.4935
20.7873	20.4935
20.7873	20.4935
20.7873	20.4935
20.7873	20.4935
20.7873	20.4935
20.7873	20.4935
20.8461	20.4935
20.8461	20.4935
20.8461	20.4935
20.8461	20.4935
20.8461	20.4935
20.8461	20.4935
20.8461	20.4935
20.8461	20.4935
20.869	20.5164
20.869	20.5164
20.869	20.5164
20.869	20.5164
20.869	20.5164
20.869	20.5164
20.869	20.5164
20.869	20.5164
20.869	20.5164
20.869	20.5164
20.869	20.5164
20.869	20.5164
20.869	20.5164
20.869	20.5164
20.869	20.5164
20.869	20.5164
20.9278	20.5164
20.9278	20.5164
20.9278	20.5751
20.9278	20.5751
20.9278	20.5751
20.9278	20.5751
20.9278	20.5164
20.9278	20.5164
20.9278	20.5164
20.9866	20.5164
20.9866	20.5164
20.9866	20.5164
20.9866	20.5164
20.9866	20.5164
21.1041	20.5164
21.1041	20.5164
21.1041	20.5751
21.1041	20.5751
21.1041	20.5751
21.2804	20.5751
21.2804	20.5751
21.2804	20.5751
21.2804	20.5751
21.2804	20.5751
21.5743	20.5751
21.5743	20.5751
21.5743	20.6339
21.5743	20.6339
21.5743	20.6339
21.8094	20.6339
21.8094	20.6339
21.8094	20.6339
21.8094	20.6339
21.7407	20.5652
21.9171	20.5652
21.9171	20.6828
21.9171	20.6828
21.9171	20.6828
22.2109	20.6828
22.2109	20.6828
22.2109	20.7416
22.2109	20.7416
22.2109	20.7416
22.5048	20.7416
22.5048	20.7416
22.5048	20.7416
22.5048	20.7416
22.5048	20.7416
22.7987	20.7416
22.7987	20.7416
22.7987	20.8591
22.7987	20.8591
22.7987	20.8591
23.0926	20.8591
23.0926	20.8591
23.0926	20.9179
23.0926	20.9179
23.0926	20.9179
23.3864	20.9179
23.3864	20.9179
23.3864	21.0354
23.3864	21.0354
23.3864	21.0354
23.7391	21.0354
23.7391	21.0942
23.7391	21.0942
23.7391	21.0942
23.9154	21.0942
23.9154	21.0942
23.9154	21.2118
23.9154	21.2118
23.9154	21.2118
24.268	21.2118
24.268	21.2118
24.268	21.2118
24.268	21.2118
24.268	21.2118
24.5031	21.2118
24.4574	21.166
24.4574	21.166
24.4574	21.166
24.81	21.166
24.81	21.166
24.81	21.2835
24.81	21.2835
24.81	21.2835
25.2802	21.2835
25.2802	21.2835
25.2802	21.3423
25.2802	21.3423
25.2802	21.3423
25.6916	21.3423
25.6916	21.3423
25.6916	21.4011
25.6916	21.4011
25.6916	21.4011
26.2206	21.4011
26.2206	21.4011
26.2206	21.4011
26.2206	21.4011
26.2206	21.4011
26.8083	21.4011
26.8083	21.4599
26.8083	21.4599
26.8083	21.4599
27.5136	21.4599
27.5136	21.4599
27.5136	21.4599
27.5136	21.4599
27.5136	21.4599
28.2189	21.4599
28.2189	21.4599
28.2189	21.5186
28.2189	21.5186
28.2189	21.5186
28.9242	21.5186
28.9242	21.5186
28.9242	21.5774
28.9242	21.5774
28.9242	21.5774
29.9822	21.5774
29.9822	21.5774
29.9822	21.5774
29.9822	21.5774
29.9822	21.5774
31.2627	21.5774
31.3005	21.6156
31.3005	21.6156
31.3005	21.6156
32.5809	21.6156
32.5809	21.6156
32.5809	21.7919
32.5809	21.7919
32.5809	21.7919
34.4433	21.7919
34.4433	21.7919
34.4433	21.8507
34.4433	21.8507
34.4433	21.8507
36.4221	21.8507
36.4221	21.8507
36.4221	21.9094
36.4221	21.9094
36.4221	21.9094
38.5173	21.9094
38.5173	22.027
38.5173	22.027
38.5173	22.027
41.3045	22.027
41.3045	22.027
41.3045	22.1445
41.3045	22.1445
41.3045	22.1445
44.2003	22.1445
44.2003	22.1445
44.2003	22.2621
44.2003	22.2621
44.2003	22.2621
47.0382	22.2621
47.0382	22.2621
47.0382	22.3796
47.0382	22.3796
47.0382	22.3796
50.6837	22.3796
50.6837	22.3796
50.6837	22.4384
50.6837	22.4384
50.6837	22.4384
54.8335	22.4384
54.8335	22.6735
54.8335	22.6735
54.8335	22.6735
59.3867	22.6735
59.3867	22.6735
59.3718	22.6582
59.3718	22.6582
59.3718	22.6582
63.9061	22.6582
63.9061	22.6582
63.9061	22.9521
63.9061	22.9521
63.9061	22.9521
68.8389	22.9521
68.8389	22.9521
68.8389	23.1284
68.8389	23.1284
68.8389	23.1284
76.6809	23.1284
76.6809	23.1284
76.6809	23.246
76.6809	23.246
84.9325	23.246
84.9325	23.246
84.9325	23.5399
84.9325	23.5399
84.9325	23.5399
96.4771	23.5399
96.4771	23.5399
96.4771	23.775
96.4771	23.775
96.4771	23.775
114.82	23.775
114.82	23.775
114.82	24.0688
114.82	24.0688
114.82	24.0688
144.382	24.0688
144.382	24.0688
144.382	24.3627
144.382	24.3627
144.382	24.3627
179.995	24.3627
179.995	24.3627
179.995	24.6566
179.995	24.6566
179.995	24.6566
212.209	24.6566
212.209	24.6566
212.209	25.1855
212.209	25.1855
212.209	25.1855
216.008	25.1855
216.008	25.1855
216.008	25.1855
216.008	25.1855
196.938	25.1855
196.938	25.1855
196.938	26.4786
196.938	26.4786
196.938	26.4786
175.819	26.4786
175.819	26.4786
175.819	27.0663
175.819	27.0663
175.819	27.0663
172.06	27.0663
172.06	27.0663
172.06	27.8892
172.06	27.8892
172.06	27.8892
179.16	27.8892
179.16	27.8892
179.16	28.4182
179.16	28.4182
179.16	28.4182
180.89	28.4182
180.89	28.9471
180.89	28.9471
180.89	28.9471
178.086	28.9471
178.086	28.9471
178.086	29.7112
178.086	29.7112
178.086	29.7112
165.995	29.7112
165.995	29.7112
165.995	30.5288
165.995	30.5288
165.995	30.5288
148.516	30.5288
148.516	30.5288
148.516	31.5764
148.516	31.5764
148.516	31.5764
136.326	31.5764
136.326	31.5764
136.326	32.624
136.326	32.624
136.326	32.624
126.742	32.624
126.644	32.5258
126.644	32.5258
126.644	32.5258
114.375	32.5258
114.375	32.5258
114.375	34.7956
114.375	34.7956
114.375	34.7956
106.573	34.7956
106.573	34.7956
106.573	36.3088
106.573	36.3088
106.573	36.3088
98.565	36.3088
98.565	36.3088
98.565	37.9966
98.565	37.9966
91.4929	37.9966
91.4929	37.9966
91.4929	40.0913
91.4929	40.0913
91.4929	40.0913
83.918	40.0913
83.918	40.0913
83.918	42.8134
83.918	42.8134
83.918	42.8134
77.0993	42.8134
77.0993	42.8134
77.0993	45.3617
77.0993	45.3617
77.0993	45.3617
71.3773	45.3617
71.3773	45.3617
71.3773	48.2576
71.3773	48.2576
71.3773	48.2576
66.7346	48.2576
66.7346	51.8971
66.7346	51.8971
66.7346	51.8971
66.7346	51.8971
63.4651	51.8971
63.4651	57.6607
63.4651	57.6607
63.4651	57.6607
60.4252	57.6607
60.4252	57.6607
60.4103	57.6457
60.4103	57.6457
60.4103	57.6457
58.0492	57.6457
58.0492	64.9989
58.0492	64.9989
58.0492	64.9989
55.4555	64.9989
55.4555	64.9989
55.4555	67.1212
55.4555	67.1212
55.4555	67.1212
52.8619	67.1212
52.8619	67.1212
52.8619	72.3924
52.8619	72.3924
52.8619	72.3924
49.8642	72.3924
49.8642	72.3924
49.8642	79.2588
49.8642	79.2588
49.8642	79.2588
47.3738	79.2588
47.3738	79.2588
47.3738	88.2623
47.3738	88.2623
47.3738	88.2623
45.5784	88.2623
45.5784	88.2623
45.5784	98.7226
45.5784	98.7226
45.5784	98.7226
44.1884	98.7226
44.1884	113.607
44.1884	113.607
44.1884	113.607
43.3196	113.607
43.3196	113.607
43.3196	120.444
43.3196	120.444
43.3196	120.444
43.1459	120.444
43.1459	120.444
43.1459	118.414
43.1459	118.414
43.1459	118.414
43.5513	118.414
43.5513	118.414
43.5513	118.414
43.5663	118.429
43.5663	118.429
43.5663	118.429
43.5663	118.429
43.5663	122.852
43.5663	122.852
43.5663	122.852
42.8713	122.852
42.8713	127.052
42.8713	127.052
42.8713	127.052
42.8713	127.052
41.8288	127.052
41.8288	126.06
41.8288	126.06
41.8288	126.06
40.6126	126.06
40.6126	126.06
40.6126	121.976
40.6126	121.976
40.6126	121.976
39.6262	121.976
39.6262	121.976
39.6262	121.51
39.6262	121.51
39.6262	121.51
38.5204	121.51
38.5204	121.51
38.5204	114.549
38.5204	114.549
38.5204	114.549
37.4728	114.549
37.4728	114.549
37.4728	101.847
37.4728	101.847
37.4728	101.847
36.658	101.847
36.658	101.847
36.658	95.9201
36.658	95.9201
36.658	95.9201
36.1924	95.9201
36.1924	86.2697
36.1924	86.2697
36.1924	86.2697
35.9596	86.2697
35.9596	86.2697
35.9596	86.2697
36.0049	86.3143
36.0049	86.3143
35.8885	86.3143
35.8885	86.3143
35.8885	69.9913
35.8885	69.9913
35.8885	69.9913
35.7139	69.9913
35.7139	69.9913
35.7139	64.4276
35.7139	64.4276
35.7139	64.4276
35.5393	64.4276
35.5393	64.4276
35.5393	60.183
35.5393	60.183
35.5393	60.183
35.3065	60.183
35.3065	56.7834
35.3065	56.7834
35.3065	56.7834
35.1901	56.7834
35.1901	56.7834
35.1901	54.0169
35.1901	54.0169
35.1901	54.0169
35.0737	54.0169
35.0737	54.0169
35.0737	51.7114
35.0737	51.7114
35.0737	51.7114
34.8991	51.7114
34.8991	51.7114
34.8991	49.7506
34.8991	49.7506
34.8991	49.7506
34.7827	49.7506
34.7827	49.7506
34.7827	48.0131
34.7827	48.0131
34.7827	48.0131
34.6081	48.0131
34.6081	48.0131
34.6081	46.5073
34.6081	46.5073
34.6081	46.5073
34.4335	46.5073
34.4335	46.5073
34.4713	46.5448
34.4713	46.5448
34.4131	46.5448
34.4131	46.5448
34.4131	44.1123
34.4131	44.1123
34.4131	44.1123
34.2385	44.1123
34.2385	44.1123
34.2385	43.0119
34.2385	43.0119
34.2385	43.0119
34.0057	43.0119
34.0057	43.0119
34.0057	41.9694
34.0057	41.9694
34.0057	41.9694
33.8311	41.9694
33.8311	41.9694
33.8311	41.1586
33.8311	41.1586
33.8311	41.1586
33.6565	41.1586
33.6565	40.2899
33.6565	40.2899
33.6565	40.2899
33.6565	40.2899
33.4819	40.2899
33.4819	39.5347
33.4819	39.5347
33.4819	39.5347
33.3073	39.5347
33.3073	39.5347
33.3073	38.7781
33.3073	38.7781
33.3073	38.7781
33.3073	38.7781
33.0745	38.7781
33.0745	38.1379
33.0745	38.1379
33.0745	38.1379
32.8999	38.1379
32.8999	38.1379
32.8999	37.4977
32.8999	37.4977
32.8999	37.4977
32.7253	37.4977
32.7253	37.4977
32.7857	37.5581
32.7857	37.5581
32.7857	37.5581
32.6111	37.5581
32.6111	36.3941
32.6111	36.3941
32.6111	36.3941
32.3783	36.3941
32.3783	36.3941
32.3783	35.9867
32.3783	35.9867
32.3783	35.9867
32.2619	35.9867
32.2619	35.9867
32.2619	35.4629
32.2619	35.4629
32.2619	35.4629
32.0873	35.4629
32.0873	35.4629
32.0873	35.0555
32.0873	35.0555
32.0873	35.0555
31.8545	35.0555
31.8545	35.0555
31.8545	34.5899
31.8545	34.5899
31.8545	34.5899
31.7381	34.5899
31.7381	34.5899
31.7381	34.1825
31.7381	34.1825
31.7381	34.1825
31.5053	34.1825
31.5053	33.7751
31.5053	33.7751
31.5053	33.7751
31.3307	33.7751
31.3307	33.7751
31.3307	33.4841
31.3307	33.4841
31.3307	33.4841
31.2143	33.4841
31.2143	33.4841
31.2143	33.1349
31.2143	33.1349
31.2143	33.1349
31.0397	33.1349
31.0397	33.1349
31.0775	33.1727
31.0775	33.1727
30.9029	33.1727
30.9029	33.1727
30.9029	32.5907
30.9029	32.5907
30.9029	32.5907
30.7283	32.5907
30.7283	32.5907
30.7283	32.2415
30.7283	32.2415
30.7283	32.2415
30.6119	32.2415
30.6119	32.2415
30.6119	31.9505
30.6119	31.9505
30.6119	31.9505
30.4373	31.9505
30.4373	31.9505
30.4373	31.6595
30.4373	31.6595
30.4373	31.6595
30.3209	31.6595
30.3209	31.6595
30.3209	31.4849
30.3209	31.4849
30.3209	31.4849
30.2045	31.4849
30.2045	31.2521
30.2045	31.2521
30.2045	31.2521
30.0299	31.2521
30.0299	31.2521
30.0299	31.0193
30.0299	31.0193
30.0299	31.0193
29.9127	31.0193
29.9127	31.0193
29.9127	30.7865
29.9127	30.7865
29.9127	30.7865
29.7951	30.7865
29.7951	30.7865
29.7951	30.5537
29.7951	30.5537
29.7951	30.5537
29.6776	30.5537
29.6776	30.5537
29.7081	30.5839
29.7081	30.5839
29.7081	30.5839
